# 1 **Geographic variation of mutagenic exposures in kidney cancer genomes**

2

3 Sergey Senkin<sup>1</sup>, Sarah Moody<sup>2</sup>, Marcos Díaz-Gay<sup>3,4,5</sup>, Behnoush Abedi-Ardekani<sup>1</sup>, Thomas  
4 Cattiaux<sup>1</sup>, Aida Ferreira-Iglesias<sup>1</sup>, Jingwei Wang<sup>2</sup>, Stephen Fitzgerald<sup>2</sup>, Mariya  
5 Kazachkova<sup>3,6,5</sup>, Raviteja Vangara<sup>3,4,5</sup>, Anh Phuong Le<sup>2</sup>, Erik N. Bergstrom<sup>3,4,5</sup>, Azhar  
6 Khandekar<sup>3,4,5</sup>, Burçak Otlu<sup>3,4,5,7</sup>, Saamin Cheema<sup>2</sup>, Calli Latimer<sup>2</sup>, Emily Thomas<sup>2</sup>, Joshua  
7 Ronald Atkins<sup>8</sup>, Karl Smith-Byrne<sup>8</sup>, Ricardo Cortez Cardoso Penha<sup>1</sup>, Christine Carreira<sup>9</sup>,  
8 Priscilia Chopard<sup>1</sup>, Valérie Gaborieau<sup>1</sup>, Pekka Keski-Rahkonen<sup>10</sup>, David Jones<sup>2</sup>, Jon W.  
9 Teague<sup>2</sup>, Sophie Ferlicot<sup>11</sup>, Mojgan Asgari<sup>12</sup>, Surasak Sangkhathat<sup>13</sup>, Worapat  
10 Attawettayanon<sup>14</sup>, Beata Świątkowska<sup>15</sup>, Sonata Jarmalaite<sup>16,17</sup>, Rasa Sabaliauskaite<sup>16</sup>,  
11 Tatsuhiro Shibata<sup>18,19</sup>, Akihiko Fukagawa<sup>19,20</sup>, Dana Mates<sup>21</sup>, Viorel Jinga<sup>22</sup>, Stefan Rascu<sup>22</sup>,  
12 Mirjana Mijuskovic<sup>23</sup>, Slavisa Savic<sup>24</sup>, Sasa Milosavljevic<sup>25</sup>, John M.S. Bartlett<sup>26</sup>, Monique  
13 Albert<sup>27,28</sup>, Larry Phouthavongsy<sup>28</sup>, Patricia Ashton-Prolla<sup>29,30</sup>, Mariana R. Botton<sup>31</sup>, Brasil  
14 Silva Neto<sup>32,33</sup>, Stephania Martins Bezerra<sup>34</sup>, Maria Paula Curado<sup>35</sup>, Stênio de Cássio  
15 Zequi<sup>36,37,38,39</sup>, Rui Manuel Reis<sup>40,41</sup>, Eliney Faria<sup>42</sup>, Nei Soares Menezes<sup>43</sup>, Renata Spagnoli  
16 Ferrari<sup>42</sup>, Rosamonde E. Banks<sup>44</sup>, Naveen S. Vasudev<sup>44</sup>, David Zaridze<sup>45</sup>, Anush Mukeriya<sup>45</sup>,  
17 Oxana Shangina<sup>45</sup>, Vsevolod Matveev<sup>46</sup>, Lenka Foretova<sup>47</sup>, Marie Navratilova<sup>47</sup>, Ivana  
18 Holcatova<sup>48,49</sup>, Anna Hornakova<sup>50</sup>, Vladimir Janout<sup>51</sup>, Mark Purdue<sup>52</sup>, Nathaniel Rothman<sup>52</sup>,  
19 Stephen J. Chanock<sup>52</sup>, Per Magne Ueland<sup>53</sup>, Mattias Johansson<sup>1</sup>, James McKay<sup>1</sup>, Ghislaine  
20 Scelo<sup>54</sup>, Estelle Chanudet<sup>55</sup>, Laura Humphreys<sup>2</sup>, Ana Carolina de Carvalho<sup>1</sup>, Sandra  
21 Perdomo<sup>1</sup>, Ludmil B. Alexandrov<sup>3,4,5</sup>, Michael R. Stratton<sup>2</sup>, Paul Brennan<sup>1\*</sup>

22

23 <sup>1</sup>Genomic Epidemiology Branch, International Agency for Research on Cancer (IARC/WHO),  
24 Lyon, France, <sup>2</sup>Cancer, Ageing and Somatic Mutation, Wellcome Sanger Institute,  
25 Cambridge, UK, <sup>3</sup>Department of Cellular and Molecular Medicine, University of California  
26 San Diego, La Jolla, USA, <sup>4</sup>Department of Bioengineering, University of California San  
27 Diego, La Jolla, USA, <sup>5</sup>Moore's Cancer Center, University of California San Diego, La Jolla,

NOTE: This preprint reports new research that has not been certified by peer review and should not be used to guide clinical practice.

28 USA, <sup>6</sup>Biomedical Sciences Graduate Program, University of California San Diego, La Jolla,  
29 USA, <sup>7</sup>Department of Health Informatics, Graduate School of Informatics, Middle East  
30 Technical University, Ankara, Turkey, <sup>8</sup>Cancer Epidemiology Unit, The Nuffield Department  
31 of Population Health, University of Oxford, Oxford, UK, <sup>9</sup>Evidence Synthesis and  
32 Classification Branch, International Agency for Research on Cancer (IARC/WHO), Lyon,  
33 France, <sup>10</sup>Nutrition and Metabolism Branch, International Agency for Research on Cancer  
34 (IARC/WHO), Lyon, France, <sup>11</sup>Service d'Anatomie Pathologique, Assistance Publique-  
35 Hôpitaux de Paris, Univeristé Paris-Saclay, Le Kremlin-Bicêtre, France, <sup>12</sup>Oncopathology  
36 Research Center, Iran University of Medical Sciences, Tehran, Iran, <sup>13</sup>Translational Medicine  
37 Research Center, Faculty of Medicine, Prince of Songkla University, Hat Yai,  
38 Thailand, <sup>14</sup>Department of Surgery, Urology, Faculty of Medicine, Prince of Songkla  
39 University, Hat Yai, Thailand, <sup>15</sup>Department of Environmental Epidemiology, Nofer Institute of  
40 Occupational Medicine, Łódź, Poland, <sup>16</sup>Laboratory of Genetic Diagnostic, National Cancer  
41 Institute, Vilnius, Lithuania, <sup>17</sup>Department of Botany and Genetics, Institute of Biosciences,  
42 Vilnius University, Vilnius, Lithuania, <sup>18</sup>Laboratory of Molecular Medicine, The Institute of  
43 Medical Science, The University of Tokyo, Minato-ku, Japan, <sup>19</sup>Division of Cancer Genomics,  
44 National Cancer Center Research Institute, Chuo-ku, Japan, <sup>20</sup>Department of Pathology,  
45 Graduate School of Medicine, The University of Tokyo, Bunkyo-ku, Japan, <sup>21</sup>Occupational  
46 Health and Toxicology, National Center for Environmental Risk Monitoring, National Institute  
47 of Public Health, Bucharest, Romania, <sup>22</sup>Urology Department, "Carol Davila" University of  
48 Medicine and Pharmacy - "Prof. Dr. Th. Burgele" Clinical Hospital, Bucharest,  
49 Romania, <sup>23</sup>Clinic of Nefrology, Faculty of Medicine, Military Medical Academy, Belgrade,  
50 Serbia, <sup>24</sup>Department of Urology, University Hospital "Dr D. Misovic" Clinical Center,  
51 Belgrade, Serbia, <sup>25</sup>International Organization for Cancer Prevention and Research,  
52 Belgrade, Serbia, <sup>26</sup>Cancer Research UK Edinburgh Centre, Institute of Genetics and  
53 Cancer, University of Edinburgh, Edinburgh, Scotland, <sup>27</sup>Centre for Biodiversity Genomics,  
54 University of Guelph, Guelph, Canada, <sup>28</sup>Ontario Tumour Bank, Ontario Institute for Cancer  
55 Research, Toronto, Canada, <sup>29</sup>Experimental Research Center, Genomic Medicine

56 Laboratory, Hospital de Clínicas de Porto Alegre, Porto Alegre, Brazil, <sup>30</sup>Post-Graduate  
57 Program in Genetics and Molecular Biology, Universidade Federal do Rio Grande do Sul,  
58 Porto Alegre, Brazil, <sup>31</sup>Diagnostic Laboratory Service, Personalized Medicine, Hospital de  
59 Clínicas de Porto Alegre, Porto Alegre, Brazil, <sup>32</sup>Service of Urology, Hospital de Clínicas de  
60 Porto Alegre, Porto Alegre, Brazil, <sup>33</sup>Post-Graduate Program in Medicine: Surgical Sciences,  
61 Universidade Federal do Rio Grande do Sul, Porto Alegre, Brazil, <sup>34</sup>Department of Anatomic  
62 Pathology, A.C. Camargo Cancer Center, São Paulo, Brazil, <sup>35</sup>Department of Epidemiology,  
63 A.C. Camargo Cancer Center, São Paulo, Brazil, <sup>36</sup>Department of Urology, A.C. Camargo  
64 Cancer Center, São Paulo, Brazil, <sup>37</sup>National Institute for Science and Technology in  
65 Oncogenomics and Therapeutic Innovation, A.C. Camargo Cancer Center, São Paulo,  
66 Brazil, <sup>38</sup>Latin American Renal Cancer Group – LARCG, São Paulo, Brazil, <sup>39</sup>Department of  
67 Surgery, Division of Urology, Sao Paulo Federal University - UNIFESP, São Paulo,  
68 Brazil, <sup>40</sup>Molecular Oncology Research Center, Barretos Cancer Hospital, Brazil, <sup>41</sup>Life and  
69 Health Sciences Research Institute (ICVS), School of Medicine, Minho University, Braga,  
70 Portugal, <sup>42</sup>Department of Urology, Barretos Cancer Hospital, Brazil, <sup>43</sup>Department of  
71 Pathology, Barretos Cancer Hospital, Brazil, <sup>44</sup>Leeds Institute of Medical Research at St  
72 James's, University of Leeds, Leeds, UK, <sup>45</sup>Clinical Epidemiology, N.N.Blokhin National  
73 Medical Research Centre of Oncology, Moscow, Russia, <sup>46</sup>Department of Urology,  
74 N.N.Blokhin National Medical Research Centre of Oncology, Moscow, Russia, <sup>47</sup>Department  
75 of Cancer Epidemiology and Genetics, Masaryk Memorial Cancer Institute, Brno, Czech  
76 Republic, <sup>48</sup>Institute of Public Health & Preventive Medicine, 2nd Faculty of Medicine,  
77 Charles University, Prague, Czech Republic, <sup>49</sup>Department of Oncology, 2nd Faculty of  
78 Medicine, Charles University and Motol University Hospital, Prague, Czech  
79 Republic, <sup>50</sup>Institute of Hygiene & Epidemiology, 1nd Faculty of Medicine, Charles University,  
80 Prague, Czech Republic, <sup>51</sup>Faculty of Health Sciences, Palacky University, Olomouc, Czech  
81 Republic, <sup>52</sup>Division of Cancer Epidemiology and Genetics, National Cancer Institute,  
82 Rockville, USA, <sup>53</sup>Bevital AS, Bergen, Norway, <sup>54</sup>Observational & Pragmatic Research

83 Institute Pte Ltd, Singapore, Singapore, <sup>55</sup>Department of Pathology, Radboud University

84 Medical Centre, Nijmegen, Netherlands

85 These authors contributed equally: Sergey Senkin, Sarah Moody

86 \* Corresponding author: Paul Brennan

87

## 88 **ABSTRACT**

89 International differences in the incidence of many cancer types indicate the existence of  
90 carcinogen exposures that have not been identified by conventional epidemiology yet  
91 potentially make a substantial contribution to cancer burden<sup>1</sup>. This pertains to clear cell renal  
92 cell carcinoma (ccRCC), for which obesity, hypertension, and tobacco smoking are risk factors  
93 but do not explain its geographical variation in incidence<sup>2</sup>. Some carcinogens generate somatic  
94 mutations and a complementary strategy for detecting past exposures is to sequence the  
95 genomes of cancers from populations with different incidence rates and infer underlying  
96 causes from differences in patterns of somatic mutations. Here, we sequenced 962 ccRCC  
97 from 11 countries of varying incidence. Somatic mutation profiles differed between countries.  
98 In Romania, Serbia and Thailand, mutational signatures likely caused by extracts of  
99 Aristolochia plants were present in most cases and rare elsewhere. In Japan, a mutational  
100 signature of unknown cause was found in >70% cases and <2% elsewhere. A further  
101 mutational signature of unknown cause was ubiquitous but exhibited higher mutation loads in  
102 countries with higher kidney cancer incidence rates (p-value <6 × 10<sup>-18</sup>). Known signatures of  
103 tobacco smoking correlated with tobacco consumption, but no signature was associated with  
104 obesity or hypertension suggesting non-mutagenic mechanisms of action underlying these risk  
105 factors. The results indicate the existence of multiple, geographically variable, mutagenic  
106 exposures potentially affecting 10s of millions of people and illustrate the opportunities for new  
107 insights into cancer causation through large-scale global cancer genomics.

108

109

## 110 INTRODUCTION

111 The incidence rates of most adult cancers vary substantially between geographical regions  
112 and many such differences are unexplained by known risk factors<sup>1</sup>. Together with unexplained  
113 trends in incidence over time, this indicates the likely presence of unknown environmental or  
114 lifestyle causes for many cancer types<sup>1</sup>. Traditional epidemiological studies have identified  
115 many important lifestyle, environmental and infectious risk factors for cancer. However, they  
116 have had limited success in recent decades suggesting that alternative study designs are  
117 required if further risk factors are to be identified.

118

119 Characterization of mutational signatures within cancer genomes<sup>3</sup> is an approach  
120 complementary to conventional epidemiology for investigating unknown causes of cancer.  
121 Most cancers contain thousands of somatic mutations that have occurred over the lifetime of  
122 the individual. These can be caused by endogenous cellular processes, such as imperfect  
123 DNA replication and repair, or by exposure to exogenous environmental or lifestyle mutagens  
124 such as ultraviolet radiation in sunlight and compounds in cigarette smoke. Mutational  
125 signatures are the patterns of somatic mutation imprinted on genomes by individual mutational  
126 processes. Analysis of thousands of cancer genome sequences from most cancer types has  
127 established a set of reference mutational signatures including 71 single base substitution  
128 (SBS) or doublet base substitution (DBS) signatures, and 18 small insertion and deletion (ID)  
129 signatures<sup>4</sup>. A possible etiology has been suggested for 47 SBS/DBS signatures and nine ID  
130 signatures.

131

132 Kidney cancer has particularly high incidence rates in Central and Northern Europe, notably in  
133 the Czech Republic and Lithuania, and has shown increasing incidence in high income  
134 countries in recent decades (**Fig. 1**)<sup>2</sup>. Most kidney cancers are clear cell renal cell carcinomas  
135 (ccRCC)<sup>3</sup> for which obesity, hypertension and tobacco smoking are known risk factors<sup>2</sup>.  
136 However, these account for <50% of the global ccRCC burden and do not explain geographical  
137 or temporal incidence trends. Previous ccRCC genome sequencing studies have included

138 relatively modest numbers of individuals from a small number of countries with limited variation  
139 in ccRCC incidence<sup>5-9</sup> and have not comprehensively examined associations between ccRCC  
140 risk factors and mutational signatures. To detect the activity of unknown carcinogens involved  
141 in ccRCC development and to investigate the mechanisms of action of known risk factors, we  
142 generated and analyzed epidemiological and whole genome sequencing data from a large  
143 international series of ccRCC<sup>10</sup>.

144

## 145 **RESULTS**

146 A total of 962 ccRCC cases from 11 countries in four continents were studied, including Czech  
147 Republic ( $n=259$ ), Russia ( $n=216$ ), United Kingdom ( $n=115$ ), Brazil ( $n=96$ ), Canada ( $n=73$ ),  
148 Serbia ( $n=69$ ), Romania ( $n=64$ ), Japan ( $n=36$ ), Lithuania ( $n=16$ ), Poland ( $n=13$ ), and Thailand  
149 ( $n=5$ ; **Fig. 1; Table 1; Methods**). These encompass a broad range of ccRCC incidence, from  
150 the highest global age-standardized rates (ASRs) of Lithuania and Czech Republic (ASRs of  
151 14.5 and 14.4/100,000 respectively) to the relatively low rates of Brazil and Thailand (ASRs of  
152 4.5 and 1.8/100,000 respectively)<sup>11</sup>. Epidemiological questionnaire data were available on sex,  
153 age at diagnosis, and important risk factors including body mass index (BMI), hypertension,  
154 and tobacco smoking (**Table 1, Supplementary Table 1**). DNAs from ccRCCs and blood from  
155 the same individuals were extracted and whole genome sequenced to average coverage of  
156 54-fold and 31-fold, respectively.

157

158 Somatic mutation burdens in the 962 ccRCC genomes ranged from 803 to 45,376 (median  
159 5,093) for single base substitutions (SBS), 2 to 240 (median 53) for doublet base substitutions  
160 (DBS), and 10 to 14,770 (median 695) for small insertions and deletions (**Supplementary**  
161 **Table 2**). The average burden of all three mutation types differed between the 11 countries ( $p$ -  
162 value  $<2 \times 10^{-23}$ ,  $p$ -value  $<2 \times 10^{-14}$ ,  $p$ -value  $<6 \times 10^{-14}$ , for SBSs, DBSs, and IDs, respectively).  
163 In particular, the burden of all mutation types was elevated in Romania compared to other  
164 countries (**Extended Data Fig. 1**). Principal Component Analysis (PCA) performed on the

165 proportions of the six primary SBS mutation classes (C>A, C>G, C>T, T>A, T>C, T>G) in each  
166 sample identified a distinct cluster of mainly Romanian and Serbian cases and a further cluster  
167 of mainly Japanese cases (**Extended Data Fig. 2**). The results, therefore, clearly demonstrate  
168 geographical variation of somatic mutation loads and patterns in ccRCC.

169

170 To investigate the mutational processes contributing to the geographical variation in mutation  
171 burdens we extracted mutational signatures and estimated the contribution of each signature  
172 to each ccRCC genome (**Supplementary Tables 3-7**). Ten signatures with strong similarity to  
173 a reference signature in the Catalogue of Somatic Mutations in Cancer (COSMIC) database  
174 were extracted: SBS1, due to deamination of 5-methylcytosine<sup>12</sup>; SBS2 and SBS13, due to  
175 cytosine deamination by Apolipoprotein B mRNA-editing enzyme, catalytic polypeptide-like  
176 (APOBEC) DNA editing enzymes<sup>12</sup>; SBS4, due to tobacco smoke mutagens<sup>13</sup>; SBS5, due to  
177 an endogenous mutational process in which mutations accumulate with age<sup>13</sup>; SBS12, of  
178 unknown cause; SBS18, due to DNA damage by reactive oxygen species<sup>13</sup>; SBS21 and  
179 SBS44, due to defective DNA mismatch repair<sup>13,14</sup>; and SBS22, due to Aristolochic acid  
180 exposure<sup>15,16</sup>.

181

182 Five further SBS signatures were identified which were not well described by the COSMIC  
183 catalogue (**Fig. 2; Supplementary Table 8**). SBS40a, SBS40b and SBS40c were present in  
184 most ccRCC, accounting for, on average, ~30%, ~20%, and ~3% of mutations respectively  
185 (**Fig. 2b**). Combined, they closely resemble the previously reported SBS40 (0.96 cosine  
186 similarity), suggesting that the large number of ccRCC whole genomes analyzed here provides  
187 the power to separate the constituent component signatures of SBS40. SBS40 was previously  
188 reported frequently, and at high levels, in kidney cancer, but also in other cancers, and is of  
189 unknown etiology. Like the composite SBS40, SBS40a is present in multiple cancer types.  
190 However, SBS40b and SBS40c are largely restricted to ccRCC (**Supplementary Note,**  
191 **Extended Data Fig. 3**). SBS\_H was found in a single case and SBS\_I is related to Aristolochic  
192 acid exposure (see below; SBS\_I has been renamed as SBS22b). Analysis of all other types

193 of mutational signatures, including doublet bases substitutions, small insertion and deletions,  
194 copy number variants and structural variants, is presented in Supplementary results.

195

196 The mutation burdens of multiple SBS mutational signatures varied between the 11 countries.

197 SBS22 is thought to be caused by Aristolochic acids, mutagenic derivatives of plants of the  
198 Aristolochia genus which are carcinogenic and also cause Balkan endemic nephropathy  
199 (BEN), a kidney disease prevalent in areas adjacent to the Danube in Southeastern Europe<sup>17</sup>.

200 SBS22 has previously been found in ccRCC, other urothelial tract cancers, and hepatocellular  
201 carcinomas from Romania<sup>5,18</sup> and various countries in East and South-East Asia<sup>15,16,19</sup>. In this

202 study, SBS22 was present in high proportions of ccRCC from Romania (45/64, 70%), Serbia  
203 (16/69, 23%), and Thailand (3/5, 60%), often with very high mutation burdens. Of note, given

204 the limited number of cases in Thailand, they may not be representative of ccRCC in that  
205 region. The presence of SBS22 was strongly correlated with that of new signatures SBS\_I,

206 DBS\_D, and ID\_C (**Extended Data Fig. 4-6**) which are, therefore, also probably due to  
207 Aristolochic acid exposure. SBS\_I, like SBS22, is composed predominantly of T>A mutations.

208 The signature identified previously as SBS22, has therefore been renamed SBS22a, and  
209 SBS\_I has been named SBS22b. The mutation burden of both SBS22a and SBS22b differed

210 between Serbia and Romania, with higher levels being detected in Romania, and away from  
211 recognized BEN zones (**Fig 3a-c**). The two signatures may be due to different subsets of

212 Aristolochic acids, and/or to different metabolites, which induce slightly different mutational  
213 patterns. Only five ccRCC cases were known to reside within recognized BEN zones,

214 suggesting no clear link between the two diseases. While the source of this exposure is  
215 uncertain, these results indicate that a substantial proportion of the population over a wide

216 geographical area of Eastern Europe, possibly numbering in the 10s of millions, has been  
217 exposed to Aristolochic acid containing compounds, the public health consequences of which

218 are uncertain.

219



220 SBS12 was present in 72% of Japanese and 2% of non-Japanese ccRCC (p-  
221 value= $4.7 \times 10^{-78}$ ) (**Extended Data Fig. 7h**). Compared to the mutation burdens imposed by  
222 Aristolochic acid in ccRCC, SBS12 contributed modest mutation loads. SBS12 is composed  
223 predominantly of T>C substitutions and exhibits strong transcriptional strand bias with more  
224 T>C mutations on the transcribed than untranscribed strands of protein coding genes.  
225 Transcriptional strand bias is typically caused by activity of transcription-coupled nucleotide  
226 excision repair acting on bulky DNA adducts due to exogenous mutagenic exposures such as  
227 tobacco smoke chemicals<sup>13</sup>, ultraviolet light<sup>13</sup>, Aristolochic acids<sup>15</sup>, and aflatoxins<sup>20</sup>. Assuming  
228 that transcription-coupled repair of DNA adducts is responsible for the SBS12 strand bias, the  
229 adducts are likely on adenine. Alternatively, transcriptional strand bias can also be caused by  
230 transcription-coupled damage<sup>21,22</sup>. The presence of SBS12 was replicated in two further series  
231 of whole genome sequenced ccRCC from Japan including 14 cases from an independent  
232 study group who undertook a broad genomic analysis of ccRCC but without detailed mutational  
233 signature analysis<sup>23</sup>, and a more recent unpublished series of 61 cases from an additional  
234 cohort of ccRCC sequenced by the same center as the initial cohort (**Supplementary Note**).  
235 SBS12 was present in 12/14 cases (85%) cases and 46/61 (75%) of cases, respectively.  
236 SBS12 was previously reported in hepatocellular carcinomas<sup>4,13</sup> and additional analysis of  
237 existing datasets revealed strong SBS12 enrichment in hepatocellular carcinomas from Japan  
238 compared to other countries (p-value= $3.8 \times 10^{-15}$ ; **Supplementary Note**). These results,  
239 therefore, indicate that exposure to an agent contributing SBS12 mutations to kidney and liver  
240 cancer is common in Japan and rare in the other 10 countries included in this study. The agent  
241 responsible for SBS12 is unknown although the precedents provided by other mutational  
242 signatures with strong transcriptional strand bias suggest that it is likely of exogenous  
243 origin<sup>21,22</sup>. A polymorphism in aldehyde dehydrogenase 2 known to impair metabolism of  
244 alcohol to aldehydes and common in Japan did not associate with levels of SBS12, and neither  
245 did any other common germline variants (**Supplementary Note**).  
246

247 SBS40a, SBS40b, and SBS40c were present in ccRCC from all 11 countries. The country-  
248 specific average mutation burdens of SBS40a and SBS40b positively associated with country-  
249 specific ASRs of kidney cancer incidence (p-value=0.0022 and p-value= $5.1 \times 10^{-18}$ ,  
250 respectively; **Extended Data Fig. 8a; Fig. 4a, Supplementary Table 9**), with the highest  
251 mutation loads in the Czech Republic and Lithuania. Kidney cancer incidence rates also vary  
252 between the regions of the Czech Republic and SBS40b mutation burdens differed significantly  
253 between these (p-value=0.011; **Fig 4b,c, Supplementary Table 10**), with the highest  
254 attribution in the highest risk region. SBS40b exhibits modest transcriptional strand bias and,  
255 assuming that transcription-coupled repair of DNA adducts is responsible, the adducts  
256 underlying SBS40b are likely on pyrimidines. Insertion and deletion (indel) signatures ID5 and  
257 ID8, which together contributed ~60% of the indel mutation burden on average, were also  
258 strongly associated with country-specific kidney cancer ASR (p-value= $1.3 \times 10^{-10}$  and p-  
259 value= $7.1 \times 10^{-5}$ , respectively, **Extended Data Fig. 8b,c**). Signatures ID5 and ID8 correlated  
260 with each other (Spearman's  $r=0.78$ ), as well as with SBS40b ( $r=0.79$  and  $r=0.74$ , respectively)  
261 indicating that they likely all constitute products of the same underlying mutational process.  
262 Thus, the burdens of the full complement of mutation types generated by this mutational  
263 process correlate with age-adjusted kidney cancer incidence rates. The overall mutational  
264 burden did not, however, associate significantly with kidney cancer incidence rates (**Extended**  
265 **Data Fig. 9**).

266  
267 To investigate potential mutagenic agents underlying these geographically variable signatures,  
268 an untargeted metabolomics screen of plasma was conducted on 901 individuals in the study,  
269 from all countries except Japan (**Methods**). 2,392 metabolite features were obtained, including  
270 944 independent peaks ( $r<0.85$ ). Three features were associated with SBS4 (**Supplementary**  
271 **Table 11**), with two identified as hydroxycotinine (p-value= $2.9 \times 10^{-9}$ ) and cotinine (p-value= $1.9$   
272  $\times 10^{-5}$ ), two major metabolites of nicotine<sup>24</sup>. Eight features were associated with SBS40b  
273 (**Supplementary Table 11**). One feature was identified as N,N,N-trimethyl-L-alanyl-L-proline  
274 betaine (TMAP; p-value= $1.2 \times 10^{-5}$ , **Supplementary Table 12**), increased levels of which

275 correlate strongly with reduced kidney function<sup>25</sup>. Other established measures of kidney  
276 function, including cystatin C and creatinine, were correlated with TMAP (p-value =  $2.5 \times 10^{-30}$   
277 and  $1.7 \times 10^{-69}$ , respectively) and also showed evidence of positive association with SBS40b  
278 (p-value=0.023 and 0.058, respectively). Thus, exposure to the mutagenic agent responsible  
279 for SBS40b is associated with reduced kidney function. No recognized metabolome features  
280 were significantly associated with any other signatures.

281

282 A total of 1962 “driver” mutations were found in 136 genes including *VHL*, *PBRM1*, *SETD2*  
283 and *BAP1*, the known frequently mutated cancer genes in ccRCC (Methods) (**Fig. 5a**,  
284 **Supplementary Table 13**)<sup>9,26</sup>. The frequencies of mutations in these genes were consistent  
285 across countries (**Fig. 5b**). The spectrum of all driver mutations in ccRCC with Aristolochic  
286 acid exposure (**Methods**) was enriched in T>A mutations compared to non-exposed cases  
287 (25% vs 13%, p-value=0.0062, **Fig. 5c,d**) with similar enrichment specifically in VHL mutations  
288 (30% vs 16%; **Fig. 5e,f**), and in the whole exomes (27% in exposed compared to 12% in  
289 unexposed cases). Thus genome-wide Aristolochic acid mutagenesis has contributed in a  
290 proportionate fashion to generation of driver mutations in Aristolochic acid-exposed ccRCC.  
291 The driver mutation spectrum did not show statistically significant enrichment of T>C mutations  
292 in SBS12 exposed cases (20% vs 12%, p = 0.069), but was consistent with the level of  
293 enrichment in the exome (21% in exposed compared to 15% in unexposed cases). SBS40b  
294 also did not show statistically significant enrichment possibly due to the ubiquitous exposure  
295 and its relatively flat and featureless mutation profile.

296

297 Exogenous mutagenic exposures that ultimately cause cancer may be present during the early  
298 stages of evolution of cancer clones. To time mutagenic exposures, the contribution of each  
299 mutational signature to mutations in the primary clone (relatively early) and to mutations in  
300 subclones (relatively late) were estimated<sup>27,28</sup> (**Methods**). All signatures of the putative  
301 exogenous mutagenic exposures observed in ccRCC were present at relatively early stages  
302 of cancer development, consistent with exposures to normal cells. SBS12, SBS22b, and

303 SBS40b showed higher activities in main clones compared to subclones (q-value=0.04, q-  
304 value=0.02, q-value= $2.3 \times 10^{-5}$ , respectively) (**Extended Data Fig. 10**) and SBS22a showed  
305 no significant difference<sup>15,16</sup>. By contrast, signatures due to endogenous mutational processes  
306 including APOBEC DNA editing (SBS13) and oxidative damage (SBS18), were enriched in  
307 subclones (q-value= $1.6 \times 10^{-4}$ , q-value= $3.2 \times 10^{-7}$ , respectively).

308  
309 Established or suspected risk factors for ccRCC include age, tobacco smoking, obesity,  
310 hypertension, diabetes, and environmental exposure to PFAS compounds<sup>29</sup>. Total SBS, DBS,  
311 and ID mutation burdens associated with age, as did SBS1, SBS4, SBS5, SBS40a, SBS40b,  
312 SBS22a, SBS22b, DBS2, ID1, ID5, and ID8. Total SBS (p-value= $3.1 \times 10^{-5}$ ), DBS (p-  
313 value= $3.7 \times 10^{-3}$ ) and ID (p-value= $1.3 \times 10^{-4}$ ) mutation burdens also associated with sex, with  
314 males having higher mutation burdens than females, and with SBS40b showing a similar  
315 association (p-value= $9.3 \times 10^{-5}$ ). Associations with tobacco smoking were observed for SBS4  
316 (p-value= $5.3 \times 10^{-6}$ ) and DBS2 (p-value= $2.4 \times 10^{-7}$ ), both known to be caused by tobacco  
317 carcinogens<sup>30,31</sup>. These results suggest that the known increased risk of ccRCC with tobacco  
318 smoking is due to direct exposure of the kidney to tobacco related mutagens (**Supplementary**  
319 **Note**). Associations of particular mutational signatures with other ccRCC risk factors were not  
320 observed (**Supplementary Tables 14, 15**). To complement this analysis of observational data,  
321 associations between polygenic risk scores for known ccRCC risk factors and mutational  
322 signatures<sup>32,33</sup> were examined (**Methods**). Consistent with the observational data, no  
323 associations were found between genetically inferred risk factors and mutational signatures  
324 except for tobacco smoking and DBS2 (p-value=0.01; **Supplementary Table 16**).

325

326

## 327 **DISCUSSION**

328 Somatic mutations in the genomes of 962 ccRCC patients from 11 countries indicate the  
329 existence of multiple, widespread mutational processes exhibiting substantial geographical

330 variation in their contributions to ccRCC mutation loads. The results contrast with those from  
331 552 esophageal squamous carcinomas from eight countries with widely different esophageal  
332 carcinoma incidence rates in which geographical differences in mutation burdens or signatures  
333 were not observed<sup>34</sup>. Together the studies implicate both geographically variable mutagenic  
334 and non-mutagenic carcinogenic exposures contributing to global cancer incidence. Indeed,  
335 the presence of mutational signatures associated with tobacco smoking but absence of  
336 signatures associated with other known ccRCC risk factors, such as obesity and hypertension,  
337 suggests that the latter may be mediated by non-mutagenic processes and, therefore, that  
338 both classes of carcinogen contribute to the development of ccRCC.

339  
340 The existence, identity, and carcinogenic effect of some of the agents underlying these  
341 mutational processes are known. Aristolochic acids are believed to cause SBS22a/b, and its  
342 associated signatures, but this study suggests that the geographical extent and proportion of  
343 the population acquiring mutations in South-Eastern Europe is far greater than previously  
344 anticipated, possibly affecting 10s of millions of individuals. The sources of the Aristolochic  
345 acid exposure, the manner by which it is ingested and whether the exposure continues today  
346 are uncertain, and further definition of the source and extent of this exposure is required in  
347 order to provide a foundation for public health action.

348  
349 The existence of the mutagenic exposures underlying SBS12 and SBS40b were not previously  
350 suspected, and their causative agents are unknown. Based on current information, the  
351 exposure causing SBS12 is restricted to Japan. However, larger studies are now indicated to  
352 explore the geographical extent of exposure in Japan and neighboring countries, and the  
353 proportions of their populations that have been exposed. Studies of Japanese migrants to other  
354 countries are also likely to be informative regarding the potential source of exposure. In the  
355 first instance this will be achievable by further sequencing of kidney and hepatocellular cancer  
356 genomes. However, studies of normal tissues, using recently reported sequencing methods  
357 allowing detection of somatic mutations in normal cells<sup>35</sup>, and particularly relatively accessible

358 ones such as cells in urine that can be prospectively collected, may enable large population-  
359 based studies providing better characterization of the exposure and its consequences. As with  
360 exposure to Aristolochic acid in South-Eastern Europe, it is possible that 10s of millions of  
361 individuals in East Asia are exposed to a potent mutagen, and identification of the source and  
362 extent of exposure would seem to be a public health priority.

363

364 In contrast to Aristolochic acid and the agent causing SBS12, the exposure underlying SBS40b  
365 appears to be globally ubiquitous. It predominantly causes mutations in ccRCC, with much  
366 lower burdens in other cancer types, and generates mutation loads correlating strongly with  
367 age and sex. There are few clues as to its origin or nature.

368

369 The incidence rates of ccRCC vary ~eightfold across the eleven countries from which ccRCCs  
370 were sequenced. A strong positive correlation ( $p\text{-value}=5.5 \times 10^{-18}$ ) was found between the  
371 average mutation loads attributable to SBS40b in each country (and also those of ID5 and ID8  
372 which are correlated with SBS40b) and incidence of kidney cancer within each country. This  
373 correlation reflects approximately a tripling of average country-specific SBS40b mutation loads  
374 (a difference of ~1000 mutations) in parallel with the eightfold increase of country-specific ASR.

375

376 SBS40b mutation burdens also positively correlated with biomarkers of impaired kidney  
377 function, reminiscent of the nephrotoxic effects of Aristolochic acids in Balkan endemic  
378 nephropathy. It is possible that the increased SBS40b somatic mutation load itself engenders  
379 this reduction in renal function. However, studies of other normal tissues suggest that they are  
380 generally tolerant of elevated mutation burdens, except for manifesting a higher incidence of  
381 neoplasia<sup>36,37</sup>. It is also possible that the agent underlying SBS40b is directly nephrotoxic, for  
382 example by engendering DNA damage and a response to it, and that the mutations it  
383 generates are immaterial to kidney function. It is also conceivable, however, that impaired renal  
384 function, potentially due to many different causes, results in a metabolic state which itself  
385 causes the elevated SBS40b mutation load. Whatever the mutational process underlying

386 SBS40b, it is plausible that it contributes to the geographical variation in the age standardized  
387 rates of kidney cancer incidence rates. It is of public health interest to determine the cause of  
388 SBS40b and, hence, to consider whether the exposure can be mitigated, potentially with  
389 concomitant reduction in global ccRCC incidence rates.

390

391 The absence of any association between several known risk factors for ccRCC and mutation  
392 burden, in particular for obesity and hypertension, supports a model of cancer development  
393 where mutations are essential but additional factors affect the expansion of a mutated clone  
394 and thus the chance of it progressing into cancer<sup>38</sup>. Further efforts at defining how lifestyle and  
395 environmental exposures contribute to cancer development will therefore require a greater  
396 understanding of both the causes of the mutations in cell clones in normal tissue, and the  
397 further promotion of such mutant clones by non-mutagenic processes.

398

399 Finally, the substantial geographical variability of SBS12 and SBS22a/b, with most countries  
400 not showing evidence of exposure, raises the possibility that additional mutational signature  
401 studies of ccRCC involving more countries may reveal further mutagenic exposures.  
402 Furthermore, the results relating to SBS40b highlight the prospect that a significant proportion  
403 of global cancer burden may be caused by relatively ubiquitous exposures that are not readily  
404 detectable by classical cancer epidemiology studies. The conduct of large scale whole genome  
405 sequencing for other cancer sites across high and low risk populations around the world would  
406 seem to be an appropriate strategy for detecting such novel cancer causing agents.

407

408

## 409 REFERENCES

- 410 1. Brennan, P. & Davey-Smith, G. Identifying Novel Causes of Cancers to Enhance  
411 Cancer Prevention: New Strategies Are Needed. *JNCI: Journal of the National Cancer*  
412 *Institute* **114**, 353–360 (2022).
- 413 2. Hsieh, J. J. *et al.* Renal cell carcinoma. *Nat Rev Dis Primers* **3**, 17009 (2017).

- 414 3. Koh, G., Degasperi, A., Zou, X., Momen, S. & Nik-Zainal, S. Mutational signatures:  
415 emerging concepts, caveats and clinical applications. *Nat Rev Cancer* **21**, 619–637  
416 (2021).
- 417 4. Alexandrov, L. B. *et al.* The repertoire of mutational signatures in human cancer.  
418 *Nature* **578**, 94–101 (2020).
- 419 5. Scelo, G. *et al.* Variation in genomic landscape of clear cell renal cell carcinoma  
420 across Europe. *Nat Commun* **5**, 5135 (2014).
- 421 6. Mitchell, T. J. *et al.* Timing the Landmark Events in the Evolution of Clear Cell Renal  
422 Cell Cancer: TRACERx Renal. *Cell* **173**, 611-623.e17 (2018).
- 423 7. Campbell, P. J. *et al.* Pan-cancer analysis of whole genomes. *Nature* **578**, 82–93  
424 (2020).
- 425 8. Degasperi, A. *et al.* A practical framework and online tool for mutational signature  
426 analyses show intertissue variation and driver dependencies. *Nat Cancer* **1**, 249–263  
427 (2020).
- 428 9. The Cancer Genome Atlas Research Network. Comprehensive molecular  
429 characterization of clear cell renal cell carcinoma. *Nature* **499**, 43–49 (2013).
- 430 10. Mutographs Cancer Grand Challenge. <https://cancergrandchallenges.org/teams>.
- 431 11. Sung, H. *et al.* Global Cancer Statistics 2020: GLOBOCAN Estimates of Incidence  
432 and Mortality Worldwide for 36 Cancers in 185 Countries. *CA Cancer J Clin* **71**, 209–  
433 249 (2021).
- 434 12. Nik-Zainal, S. *et al.* Mutational Processes Molding the Genomes of 21 Breast  
435 Cancers. *Cell* **149**, 979–993 (2012).
- 436 13. Alexandrov, L. B. *et al.* Signatures of mutational processes in human cancer. *Nature*  
437 **500**, 415–421 (2013).
- 438 14. Drost, J. *et al.* Use of CRISPR-modified human stem cell organoids to study the origin  
439 of mutational signatures in cancer. *Science (1979)* **358**, 234–238 (2017).
- 440 15. Hoang, M. L. *et al.* Mutational Signature of Aristolochic Acid Exposure as Revealed by  
441 Whole-Exome Sequencing. *Sci Transl Med* **5**, (2013).



- 442 16. Poon, S. L. *et al.* Genome-wide mutational signatures of aristolochic acid and its  
443 application as a screening tool. *Sci Transl Med* **5**, 197ra101 (2013).
- 444 17. Grollman, A. P. Aristolochic acid nephropathy: Harbinger of a global iatrogenic  
445 disease. *Environ Mol Mutagen* **54**, 1–7 (2013).
- 446 18. Turesky, R. J. *et al.* Aristolochic acid exposure in Romania and implications for renal  
447 cell carcinoma. *Br J Cancer* **114**, 76–80 (2016).
- 448 19. Wang, X.-M. *et al.* Integrative genomic study of Chinese clear cell renal cell carcinoma  
449 reveals features associated with thrombus. *Nat Commun* **11**, 739 (2020).
- 450 20. Huang, M. N. *et al.* Genome-scale mutational signatures of aflatoxin in cells, mice, and  
451 human tumors. *Genome Res* **27**, 1475–1486 (2017).
- 452 21. Haradhvala, N. J. *et al.* Mutational Strand Asymmetries in Cancer Genomes Reveal  
453 Mechanisms of DNA Damage and Repair. *Cell* **164**, 538–549 (2016).
- 454 22. Nik-Zainal, S. *et al.* The genome as a record of environmental exposure. *Mutagenesis*  
455 *gev073* (2015) doi:10.1093/mutage/gev073.
- 456 23. Sato, Y. *et al.* Integrated molecular analysis of clear-cell renal cell carcinoma. *Nat*  
457 *Genet* **45**, 860–867 (2013).
- 458 24. Dempsey, D. *et al.* Nicotine metabolite ratio as an index of cytochrome P450 2A6  
459 metabolic activity. *Clin Pharmacol Ther* **76**, 64–72 (2004).
- 460 25. Velenosi, T. J. *et al.* Untargeted metabolomics reveals N, N, N-trimethyl-L-alanyl-L-  
461 proline betaine (TMAP) as a novel biomarker of kidney function. *Sci Rep* **9**, 6831  
462 (2019).
- 463 26. Sato, Y. *et al.* Integrated molecular analysis of clear-cell renal cell carcinoma. *Nat*  
464 *Genet* **45**, 860–867 (2013).
- 465 27. Nik-Zainal, S. *et al.* The life history of 21 breast cancers. *Cell* **149**, 994–1007 (2012).
- 466 28. Dentre, S. C., Wedge, D. C. & van Loo, P. Principles of Reconstructing the Subclonal  
467 Architecture of Cancers. *Cold Spring Harb Perspect Med* **7**, (2017).
- 468 29. Shearer, J. J. *et al.* Serum Concentrations of Per- and Polyfluoroalkyl Substances and  
469 Risk of Renal Cell Carcinoma. *J Natl Cancer Inst* **113**, 580–587 (2021).

- 470 30. Nik-Zainal, S. *et al.* The genome as a record of environmental exposure. *Mutagenesis*  
471 *gev073* (2015) doi:10.1093/mutage/gev073.
- 472 31. Kucab, J. E. *et al.* A Compendium of Mutational Signatures of Environmental Agents.  
473 *Cell* **177**, 821-836.e16 (2019).
- 474 32. Gabriel, A. A. G. *et al.* Genetic Analysis of Lung Cancer and the Germline Impact on  
475 Somatic Mutation Burden. *JNCI: Journal of the National Cancer Institute* **114**, 1159–  
476 1166 (2022).
- 477 33. Liu, Y., Gusev, A., Heng, Y. J., Alexandrov, L. B. & Kraft, P. Somatic mutational  
478 profiles and germline polygenic risk scores in human cancer. *Genome Med* **14**, 14  
479 (2022).
- 480 34. Moody, S. *et al.* Mutational signatures in esophageal squamous cell carcinoma from  
481 eight countries with varying incidence. *Nat Genet* **53**, 1553–1563 (2021).
- 482 35. Abascal, F. *et al.* Somatic mutation landscapes at single-molecule resolution. *Nature*  
483 **593**, 405–410 (2021).
- 484 36. Martincorena, I. *et al.* High burden and pervasive positive selection of somatic  
485 mutations in normal human skin. *Science (1979)* **348**, 880–886 (2015).
- 486 37. Martincorena, I. *et al.* Somatic mutant clones colonize the human esophagus with age.  
487 *Science (1979)* **362**, 911–917 (2018).
- 488 38. Fowler, J. C. & Jones, P. H. Somatic Mutation: What Shapes the Mutational  
489 Landscape of Normal Epithelia? *Cancer Discov* **12**, 1642–1655 (2022).

490

## 491 **FIGURE AND TABLE LEGENDS**

### 492 **Fig. 1: Eleven participating countries and estimated age-standardized incidence rates** 493 **of clear cell renal cell carcinomas.**

494 Incidence of clear cell renal cell carcinomas (ccRCC), men and women combined, age-  
495 standardized incidence rates (ASR) per 100,000, data from GLOBOCAN 2020. Markers  
496 indicate countries included in this study (number of participating ccRCC patients per  
497 country).

498

499 **Table 1. Summary of clear cell renal cell carcinomas risk factors included in this**  
500 **study.**

501

502 **Fig. 2: Single base substitution signature operative in clear cell renal cell carcinomas.**

503 **(a)** TMB plot showing the frequency and mutations per Mb for each of the decomposed SBS  
504 signatures. **(b)** Average relative attribution for single base substitution (SBS) signatures  
505 across countries. Signatures contributing less than 5% on average are grouped in the  
506 'Others' category, apart from SBS12 and AA-related signatures SBS22a and SBS22b. '<95%  
507 confidence' category accounts for the proportion of mutation burden which could not be  
508 assigned to any signature with confidence level of at least 95%. **(c)** Decomposed signatures,  
509 including reference COSMIC signatures as well as *de novo* signatures not decomposed into  
510 COSMIC reference signatures.

511

512 **Fig. 3: Geospatial analysis of Aristolochic acid-related SBS signatures.**

513 Distribution of Romanian and Serbian cases with known residential history, along with the  
514 summed levels of SBS22a and SBS22b attributions (per-case and regional estimate), with  
515 respect to the Balkan endemic nephropathy (BEN) areas. White circles represented cases  
516 with no detected activity of SBS22a and SBS22b.

517

518 **Fig. 4: Association of SBS40b signature attribution with incidence of kidney cancer.**

519 **(a)** Number of mutations attributed to signature SBS40b against age-standardized incidence  
520 rates (ASR) of kidney cancer in each of the eleven countries represented in the cohort. Error  
521 bars represent standard errors of the mean. **(b)** Number of mutations attributed to signature  
522 SBS40b in four regions of Czech Republic against ASR of kidney cancer in each region.  
523 Error bars represent standard errors of the mean. In **(a)** and **(b)**, the p-values are shown for  
524 the ASR variable in linear regressions across all cases, adjusted for sex and age of  
525 diagnosis. **(c)** Levels of attribution of SBS40b signature within Czech Republic, with bar plots

526 showing the number of cases for each quartile of SBS40b attribution across Prague,  
527 Olomouc, Ceske Budejovice, and Brno regions.

528

529 **Fig. 5: Driver mutation analysis in clear cell renal cell carcinomas.**

530 **(a)** Frequency of driver genes in the cohort. Only genes mutated in at least 10 cases are  
531 shown. **(b)** Frequency of driver genes across countries. Thailand, Poland and Lithuania are  
532 not shown due to low sample numbers. **(c)** SBS-96 mutational spectra of all driver mutations  
533 in ccRCC for Aristolochic acid (AA)-exposed and unexposed cases. **(d)** Percentage of T>A  
534 driver mutations in AA-exposed and unexposed cases. **(e)** SBS-96 mutational spectra of VHL  
535 mutations in ccRCC for AA-exposed and unexposed cases. **(f)** Percentage of T>A VHL  
536 mutations in AA-exposed and unexposed cases.

537

538 **ONLINE METHODS**

539 **Recruitment of cases and informed consent**

540 The International Agency for Research on Cancer (IARC/WHO) coordinated case recruitment  
541 through an international network of over 40 collaborators from the 11 participating countries  
542 (**Table1; Supplementary Table 17**). The inclusion criteria for patients were  $\geq 18$  years of age  
543 (ranging from 23 to 87, with a mean of 60 and a standard deviation of 12), confirmed diagnosis  
544 of primary ccRCC and no prior cancer treatment. Informed consent was obtained for all  
545 participants. Patients were excluded if they had any condition that could interfere with their  
546 ability to provide informed consent or if there were no means of obtaining adequate tissues or  
547 associated data as per the protocol requirements. Ethical approvals were first obtained from  
548 each Local Research Ethics Committee and Federal Ethics Committee when applicable, as  
549 well as from the IARC Ethics Committee.

550

551 **Bio-samples, data collection, and expert pathology review**

552 Dedicated standard operating procedures, following guidelines from the International Cancer  
553 Genome Consortium (ICGC), were designed by IARC/WHO to select appropriate case series  
554 with complete biological samples and exposure information as described previously<sup>1</sup>  
555 (**Supplementary Table 17**). In brief, for all case series included, anthropometric measures  
556 were taken, together with relevant information regarding medical and familial history.  
557 Comparable smoking and alcohol history was available from all centers. Detailed  
558 epidemiological information on residential history was collected in Czech Republic, Romania,  
559 and Serbia. Potential limitations of using retrospective clinical data collected using different  
560 protocols from different populations were addressed by a central data harmonization to ensure  
561 a comparable group of exposure variables (**Supplementary Table 17**). All patient related data  
562 as well as clinical, demographical, lifestyle, pathological and outcome data were  
563 pseudonymized locally through the use a dedicated alpha-numerical identifier system before  
564 being transferred to IARC/WHO central database.

565 Original diagnostic pathology departments provided diagnostic histological details of  
566 contributing cases through standard abstract forms. IARC/WHO centralized the entire  
567 pathology workflow and coordinated a centralized digital pathology examination of the frozen  
568 tumor tissues collected for the study as well as formalin-fixed, paraffin-embedded (FFPE)  
569 sections when available, via a web-based report approach and dedicated expert panel  
570 following standardized procedures as described previously<sup>1</sup>. A minimum of 50% viable tumor  
571 cells was required for eligibility to whole genome sequencing.

572 In summary, frozen tumor tissues were first examined to confirm the morphological type and  
573 the percentage of viable tumor cells. A random selection of tumor tissues was independently  
574 evaluated by a second pathologist. Enrichment of tumor component was performed by  
575 dissection of non-tumoral part, if necessary. 90 cases overlapped with a previously published  
576 cohort recruited under the Cancer Genomics of the Kidney (CAGEKID) project<sup>2</sup>, which were  
577 also part of the Pan-Cancer Analysis of Whole Genomes (PCAWG) project<sup>3</sup>.

578

#### 579 **DNA extraction**

580 Extraction of DNA from fresh frozen tumor and matched blood samples was centrally  
581 conducted at IARC/WHO except for Japan, which performed DNA extractions at the local  
582 center following a similarly standardized DNA extraction procedure. Of the cases which  
583 proceeded to the final analysis ( $n=962$ ), germline DNA was extracted from either buffy-coat,  
584 whole blood, or from adjacent normal tissue (*viz.*, samples from Japan) using previously  
585 described protocols and methods<sup>1</sup>.

586

#### 587 **Whole genome sequencing**

588 In total, 1583 renal cell carcinoma cases were evaluated, with 1267 confirmed as ccRCC  
589 cases. 116 (9%) were excluded due to insufficient viable tumor cells (pathology level), or  
590 inadequate DNA (tumor or germline). DNA from 1151 cases was received at the Wellcome  
591 Sanger Institute for whole genome sequencing. Fluidigm SNP genotyping with a custom panel  
592 was performed to ensure that each pair of tumor and matched normal samples originated from

593 the same individual. Whole genome sequencing (150bp paired end) was performed on the  
594 Illumina NovaSeq 6000 platform with target coverage of 40X for tumors and 20X for matched  
595 normal tissues. All sequencing reads were aligned to the GRCh38 human reference genome  
596 using Burrows-Wheeler-MEM (v0.7.16a and v0.7.17). Post-sequencing QC metrics were  
597 applied for total coverage, evenness of coverage and contamination. Cases were excluded if  
598 coverage was below 30X for tumor or 15X for normal tissue. For evenness of coverage, the  
599 median over mean coverage (MoM) score was calculated. Tumors with MoM scores outside  
600 the range of values determined by previous studies to be appropriate for whole genome  
601 sequencing (0.92 – 1.09) were excluded. Conpair<sup>4</sup> (<https://github.com/nygenome/Conpair>)  
602 was used to detect contamination, cases were excluded if the result was greater than 3%<sup>5</sup>. A  
603 total of 962 cases passed all criteria and were included in subsequent analysis.

604

#### 605 **Somatic variant calling**

606 Variant calling was performed using the standard Sanger bioinformatics analysis pipeline  
607 (<https://github.com/cancerit>). Copy number profiles were determined first using the algorithms  
608 ASCAT<sup>6</sup> and BATTENBERG<sup>7</sup>, where tumor purity allowed. SNV were called with  
609 cgpCaVEMan<sup>8</sup>, indels were called with cgpPINDEL<sup>9</sup>, and structural rearrangements were  
610 called using BRASS. CaVEMan and BRASS were run using the copy number profile and purity  
611 values determined from ASCAT where possible (complete pipeline, n=857). Where tumor  
612 purity was insufficient to determine an accurate copy number profile (partial pipeline, n=105),  
613 CaVEMan and BRASS were run using copy number defaults and an estimate of purity  
614 obtained from ASCAT/BATTENBERG. For SNV additional filters (ASRD  $\geq$  140 and CLPM  
615  $=0$ ) were applied to remove potential false positive calls. A second variant caller, Strelka2,  
616 was run for SNVs and indels as consensus variant calling was previously shown to eliminate  
617 algorithm specific artefacts and to generate highly reproducible mutational spectra compared  
618 to using a single variant calling algorithm<sup>1,10</sup>. Only variants called by both the Sanger variant  
619 calling pipeline and Strelka2 were included in subsequent analysis.

620

## 621 **Validation of Japanese sequencing**

622 The matched normal tissue sequenced was blood for all countries with the exception of Japan,  
623 where adjacent normal kidney was used. As Japan displayed an enrichment of SBS12,  
624 matched blood was obtained from 28 of the 36 patients to confirm that the source of the  
625 matched normal tissue was not influencing the result. In all cases, the mutational spectra of  
626 Japanese ccRCC generated using either blood or adjacent normal kidney matched each other  
627 with a cosine similarity of  $>0.99$ .

628

## 629 **Generation of mutational matrices**

630 Mutational matrices for single base substitutions (SBS), doublet base substitutions (DBS) and  
631 small insertions and deletions (ID) were generated using SigProfilerMatrixGenerator  
632 (<https://github.com/AlexandrovLab/SigProfilerMatrixGenerator>) with default options  
633 (v1.2.12)<sup>11</sup>.

634

## 635 **Mutational signature analysis**

636 Mutational signatures were extracted using two algorithms, SigProfilerExtractor  
637 (<https://github.com/AlexandrovLab/SigProfilerExtractor>), based on nonnegative matrix  
638 factorization, and mSigHdp<sup>12</sup> (<https://github.com/steverozen/mSigHdp>), based on the  
639 Bayesian hierarchical Dirichlet process. For SigProfilerExtractor, *de novo* mutational  
640 signatures were extracted from each mutational matrix using SigProfilerExtractor with  
641 nndsvd\_min initialization (NMF\_init="nndsvd\_min") and default parameters (v1.1.9)<sup>13</sup>. Briefly,  
642 SigProfilerExtractor deciphers mutational signatures by first performing Poisson resampling of  
643 the original matrix with additional renormalization (based on a generalized mixture model  
644 approach) of hypermutators to reduce their effect on the overall factorization<sup>13</sup>. Nonnegative  
645 matrix factorization (NMF) was performed using initialization with nonnegative singular value  
646 decomposition and by applying the multiplicative update algorithm using the Kullback–Leibler  
647 divergence as an objective function<sup>13</sup>. NMF was applied with factorizations between  $k=1$  and  
648  $k=20$  signatures; each factorization was repeated 500 times<sup>13</sup>. *De novo* single base



649 substitution mutational signatures were extracted with SigProfilerExtractor for both SBS-288  
650 and SBS-1536 contexts<sup>11</sup>. The results were largely concordant with the SBS-1536 *de novo*  
651 signatures allowing additional separation of mutational processes, therefore the SBS-1536 *de*  
652 *nov*o signatures were taken forward for further analysis (**Supplementary Table 3**). Mutational  
653 signatures for DBS and ID were extracted in DBS-78 and ID-83 contexts respectively  
654 (**Supplementary Tables 4, 5**). Where possible, SigProfilerExtractor matched each *de novo*  
655 extracted mutational signature to a set of previously identified COSMIC signatures<sup>14</sup>, for SBS-  
656 1536 signatures this requires collapsing the 1536 classification into the standard 96  
657 substitution type classification with six mutation classes having single 3' and 5' sequence  
658 contexts (**Supplementary Table 8**). This step makes it possible to distinguish between *de*  
659 *nov*o signatures which can be explained by a combination of the known catalog of mutational  
660 process (which have not been completely separated during the extraction), and those which  
661 have not been previously identified. mSigHdp extraction of SBS-96 and ID-83 signatures was  
662 performed using the suggested parameters and using the country of origin to construct the  
663 hierarchy. SigProfilerExtractor's decomposition module was subsequently used to match  
664 mSigHdp *de novo* signatures to previously identified COSMIC signatures<sup>14</sup>. Further details on  
665 the comparison of results between SigProfilerExtractor and mSigHdp and decomposition of *de*  
666 *nov*o signatures into COSMIC reference signatures can be found in the **Supplementary Note**.  
667

### 668 **Attribution of activities of mutational signatures**

669 The *de novo* (SigProfiler) and COSMIC signature (SigProfiler and mSigHdp) activities were  
670 attributed for each sample using the MSA signature attribution tool (v2.0,  
671 <https://gitlab.com/s.senkin/MSA>)<sup>15</sup>. For COSMIC attributions, only COSMIC reference  
672 signatures, which were identified in the decomposition of *de novo* signatures, were included in  
673 the panel for attribution, in addition to *de novo* signatures which could not be decomposed into  
674 COSMIC reference. At its core, the tool utilizes the nonnegative least squares (NNLS)  
675 approach minimizing the L2 distance between the input sample and the one reconstructed  
676 using available signatures. To limit false positive attributions, an automated optimization

677 procedure was applied by repeated removal of all signatures that do not increase the L2  
678 similarity of a sample by  $>0.008$  for SBS,  $>0.014$  for DBS, and  $>0.03$  for ID mutation types, as  
679 suggested by simulations. These optimal penalties were derived using an optional parameter  
680 (`params.no_CI_for_penalties = false`) utilizing a conservative approach in calculation of  
681 penalties. Finally, a parametric bootstrap approach was applied to extract 95% confidence  
682 intervals for each attributed mutational signature activity.

683

#### 684 **Driver mutations**

685 A dNdS approach was used to identify genes under positive selection in ccRCC<sup>16</sup>. The analysis  
686 was performed both for the whole genome ( $q\text{-value}<0.01$ ), and with restricted hypothesis  
687 testing (RHT) for a panel of 369 known cancer genes<sup>16</sup>. Variants in any gene identified as  
688 under positive selection in global dNdS or in the 369-cancer gene panel were assessed as  
689 potential drivers<sup>16</sup>. Candidate driver mutations were annotated with the mode of action using  
690 the Cancer Gene Census (<https://cancer.sanger.ac.uk/census>) and the Cancer Genome  
691 Interpreter tool (<https://www.cancergenomeinterpreter.org>). Missense mutations were  
692 assessed using the MutationMapper tool ([http://www.cbioportal.org/mutation\\_mapper](http://www.cbioportal.org/mutation_mapper)).  
693 Variants were considered likely drivers if they met any of the following criteria: (i) Truncating  
694 mutations in genes annotated as tumor suppressors; (ii) mutations annotated as likely or  
695 known oncogenic in MutationMapper; (iii) truncating variants in genes with selection ( $q\text{-}$   
696  $\text{value}<0.05$ ) for truncating mutations assumed to be tumor suppressors and thus likely drivers;  
697 (iv) missense variants in all genes under positive selection and with dN/dS ratios for missense  
698 mutations above 5 (assuming 4 of every 5 missense mutations are drivers) labelled as likely  
699 drivers; or (v) in-frame indels in genes under significant positive selection for in-frame indels.

700

#### 701 **Evolutionary analysis**

702 Subclonal architecture reconstruction was performed using the DPclust R package v2.2.8<sup>7,17</sup>,  
703 after obtaining cancer cell fraction (CCF) estimates by `dpclust3p` v1.0.8  
704 (<https://github.com/Wedge-lab/dpclust3p>) based on the variant allele frequency provided by

705 the somatic variant callers and the copy number profiles determined by the BATTENBERG  
706 algorithm. Only tumors with at least 40% purity according to BATTENBERG were considered  
707 for further evolutionary analysis. For each tumor with at least one subclone, the respective  
708 somatic mutations were split into clonal and subclonal mutations using the most probable  
709 cluster assignment for each mutation as per the DPCLust output. Mutations not assigned to a  
710 cluster by DPCLust were removed from further analysis. Clusters centered at a CCF>1.5 and  
711 ones where chromosome X contributed the highest number of mutations were deemed  
712 artifactual, and the respective mutations were removed. Samples with a total number of clonal  
713 or subclonal mutations below 256 were also removed. Additionally, samples with poor  
714 separation between the clonal and subclonal distributions (e.g., subclone centered at a  
715 CCF>0.80) were removed. Finally, only samples that had both a clone and at least one  
716 subclone post-filtering were retained for further analysis. This yielded a total of 223 samples,  
717 each with clonal and subclonal mutations. SigProfilerAssignment (v0.0.13)  
718 (<https://github.com/AlexandrovLab/SigProfilerAssignment>) was used to identify the activity of  
719 each mutational signature in each clone/subclone, and these activities were then normalized  
720 by the total number of mutations belonging to the clone/subclone (i.e., clonal mutations were  
721 not included in the subclone). A two-sided Wilcoxon Signed-Rank Test<sup>18</sup> was used to assess  
722 the differences in the relative activity of each mutational signature between the clones and  
723 their respective subclones. P-values were corrected using the Benjamini-Hochberg  
724 procedure<sup>19</sup> and reported as q-values in the manuscript.

725

## 726 **Regressions**

727 Signature attributions were dichotomized into presence and absence using confidence  
728 intervals, with presence defined as both lower and upper limits being positive, and absence as  
729 the lower limit being zero. If a signature was present in at least 75% of cases (SBS1, SBS40a,  
730 SBS40b, ID1, and ID5), it was dichotomized into above and below the median of attributed  
731 mutation counts. The binary attributions served as dependent variables in logistic regressions,  
732 and relevant risk factors were used as factorized independent variables. To adjust for

733 confounding factors, sex, age of diagnosis, country, and tobacco status were added as  
734 covariates in regressions. The Bonferroni method was used to test for significant p-values (*i.e.*,  
735 a total of 224 comparisons for regressions with signatures, and a total of 24 comparisons for  
736 regressions with mutation burden). P-values reported are raw (not corrected). Regressions  
737 with incidence of renal cancer were performed as linear regressions with mutation burdens or  
738 signature attributions (those present in at least 75% of cases) with confidence intervals not  
739 consistent with zero as a dependent variable, and age-standardized rates (ASR) of renal  
740 cancer obtained from Global Cancer Observatory (GLOBOCAN)<sup>20</sup>, sex and age of diagnosis  
741 as independent variables. ASR of renal cancer for regions of Czech Republic were obtained  
742 from SVOD web portal<sup>21</sup>. Signatures present in less than 75% of cases were dichotomized into  
743 presence and absence as previously mentioned and analyzed using the logistic regressions.  
744 All regressions were performed on a sample basis.

745

#### 746 **Polygenic risk score (PRS) analysis of lifestyle risk factors**

747 In this analysis, we used the genome-wide association studies (GWAS) summary statistics  
748 estimated in European populations for well-established risk factors for ccRCC. For tobacco  
749 smoking status, we used results from the GSCAN consortium meta-analysis of smoking  
750 initiation (ever vs never status)<sup>22</sup>. For body mass index (BMI), the results of UK biobank (UKBB)  
751 and GIANT consortium meta-analysis of continuous BMI were used<sup>23</sup>. GWAS summary  
752 statistics related to hypertension, namely systolic blood pressure and diastolic blood pressure,  
753 as well as the ones related to diabetes<sup>24</sup>, such as fasting glucose and fasting insulin were also  
754 obtained using UKBB studies<sup>25</sup>.

755

756 Since all the GWAS summary statistics used in the current work were based on European  
757 populations, we used ADMIXTURE tool (v1.3.0)<sup>26</sup> and principal component analysis (PCA) to  
758 infer the unsupervised cluster of individuals with European genetic background within ccRCC  
759 cases. Hapmap SNPs (n=1,176,821 variants) were extracted from the ccRCC whole-genome  
760 sequence genotype data. After basic quality control using PLINK (v1.9b, [www.cog-](http://www.cog-)

761 [genomics.org/plink/1.9/](https://www.cog-genomics.org/plink/1.9/)), 333 variants were removed due to missing genotype rate > 5%, 1,236  
762 variants failed Hardy-Weinberg equilibrium test ( $p$ -values $<10^{-8}$ ), and 18,702 variants had  
763 MAF $<1\%$  in our cohort. Additionally, 3 ambiguous variants and 21,358 variants within regions  
764 of long-range, high linkage disequilibrium (LD) in the human genome (hg38) were excluded.  
765 After pruning for linkage disequilibrium, 143,727 variants remained in ccRCC genotype data.  
766 The 1000 genome reference population genotype data (phase 3) for Europeans (N=489),  
767 Africans (YRI, N=108) and East Asians (N=103 from China and 104 from Japan)  
768 (<https://www.internationalgenome.org/data/>) were filtered and merged with ccRCC genotype  
769 data based on the pruned set of variants present in both datasets. ADMIXTURE was run on  
770 the merged genotype data with  $k=3$ , which would correspond to the three ancestral continental  
771 population groups that likely reflect the participants of our study. The ccRCC cases with  
772 European genetic fraction greater than 80% by the ADMIXTURE analysis were selected for  
773 the polygenic risk scores (PRS) analyses. To complement the ADMIXTURE analysis, PCA  
774 was run on the same samples.

775

776 The initial genotype data based on whole-genome sequence from 849 ccRCC cases with  
777 European genetic background consisted of biallelic SNPs with MAF  $>0.01\%$  (to exclude ultra-  
778 rare variants; N ~ 30 million variants). After basic quality control, variants with missing  
779 genotype rate of greater than 5% (N=7,519,196 variants) with strong deviation from Hardy-  
780 Weinberg equilibrium ( $p$ -values $<10^{-8}$ , N=220,862) were excluded. For each GWAS trait, we  
781 restricted our analyses to the biallelic SNPs with minor allele frequency (MAF) greater than 1%  
782 in the 1000 genomes reference for European populations. For the selection of the independent  
783 genome-wide significant hits ( $p$ -values $<5 \times 10^{-8}$ ) of each GWAS summary statistic used to  
784 generate the PRS, SNPs were clumped ( $r^2=0.1$  within a LD window of 10 MB) using PLINK  
785 (v1.9b, [www.cog-genomics.org/plink/1.9/](https://www.cog-genomics.org/plink/1.9/)) based on the 1000 genomes European reference  
786 population genotype data (N=489; ~ 10 million variants). Where a selected GWAS hit was not  
787 found in ccRCC genotype data, we extracted proxies ( $r^2>0.8$  in 1000 genomes) also present  
788 in ccRCC dataset where possible (**Supplementary Table 18**). The variance of each genetic

789 trait explained by the genetic variants were calculated as previously suggested<sup>27</sup>. PRS was  
790 subsequently calculated as the sum of the individual's beta-weighted genotypes using PRSice-  
791 2 software<sup>28</sup>. Associations were estimated per standard deviation increase in the PRS, which  
792 was normalized to have a mean of zero across ccRCC cases of European genetic ancestry.

793

#### 794 **Untargeted metabolomics association with signatures**

795 Of the 962 subjects from the main analysis, 901 subjects were included in this sub-study – all  
796 Japanese samples ( $n=36$ ) as well as few cases from Czech Republic ( $n=13$ ), Romania ( $n=5$ )  
797 and Russia ( $n=3$ ) were not included due to lack of available plasma samples. Samples were  
798 randomized and analyzed as two independent analytical batches. Analysis was performed with  
799 a UHPLC-QTOF-MS system that consisted of a 1,290 Binary LC and a 6,550 QTOF mass  
800 spectrometer equipped with Jet Stream electrospray ionization source (Agilent Technologies),  
801 using previously described methods<sup>29</sup>. Pre-processing was performed using Profinder  
802 10.0.2.162 and Mass Profiler Professional B.14.9.1 software (Agilent Technologies). A “Batch  
803 recursive feature extraction (small molecules)” process was employed for samples and blanks  
804 to find  $[M+H]^+$  ions. The two batches were processed separately and the resulting features  
805 were aligned in Mass Profiler Professional. Chromatographic peak areas were used as a  
806 measurement of intensity. No normalization or transformation of raw data was performed prior  
807 to the downstream data analysis.

808

809 A total of 2,392 features were detectable in at least one of the 901 samples. Features present  
810 in only one of the two batches were filtered out. Recursive filtering elimination was applied to  
811 decrease redundancy from highly correlated variables ( $r \geq 0.85$ , Pearson's  $r$  calculated before  
812 any transformation/imputation) by selecting the features with least missing data within clusters  
813 of features. A total of 944 features were included in the statistical analysis. Features were pre-  
814 processed: missing values were replaced with 1/5 of the minimal value of the feature before  
815 applying mean centering and Pareto scaling. Each feature was regressed against both *de novo*  
816 and COSMIC signatures, adjusting for sex and age of diagnosis, as well as body mass index

817 (BMI) and technical factors (batch, acquisition order) that could impact chromatographic peak  
818 area. Models for SBS22a and SBS22b were restricted to Romanian and Serbian samples to  
819 find potential pathways of Aristolochic acid exposure in the Balkan region. Logistic models  
820 were used for zero-inflated signatures ( $\geq 30\%$  zeros) while quasi-Poisson regressions were  
821 used for the least zero-inflated signatures (SBS1, SBS40a, and SBS40b). To derive specific  
822 false detection rates, random variables were created from permutations of the initial features  
823 and regressed against signatures in the same fashion as true features. Maximum p-value  
824 thresholds from regressions with random features were compared to adjusted p-value  
825 thresholds according to Bonferroni's procedure. The more conservative approach was used in  
826 selecting features of interest. Random forest models were also used as cross-checking  
827 multivariate models to assess the relative importance of each feature in explaining the  
828 signature attribution. As with univariate models, regression models were used for the least  
829 zero-inflated signatures ( $< 30\%$  of zeros) while classification models were used for all other  
830 signatures, with restriction to Romanian and Serbian samples for SBS22a and SBS22b.  
831 Importance was estimated from the total decrease in node impurities from splitting on the  
832 variable, averaged over all trees. Node impurity was measured by the Gini index for  
833 classification, and by residual sum of squares for regression. The significance of importance  
834 metrics for Random Forest models were estimated by permuting the response variable  
835 (<https://github.com/EricArcher/rfPermute>).

836  
837 Features considered for identification, along with their highly correlated counterparts, were  
838 searched in Human Metabolome Database (HMDB), LipidMaps, Metlin, and Kegg. Compound  
839 identity was confirmed by comparison of retention times and MS/MS fragmentation against  
840 chemical standards when available, or otherwise against reference MS/MS spectra. Since the  
841 feature 240.1468@0.8929933 was strongly correlated with several features identified as  
842 TMAP (**Supplementary Table 11**), the integration of these features was inspected and  
843 corrected manually, and regressed against SBS40b using the same model applied to features  
844 selected for analysis. Creatinine was identified among the features by matching its retention

845 time and MS/MS spectra against a reference standard and also regressed against SBS40b in  
846 the same fashion as other metabolites. Estimation of correlation between metabolic features  
847 was done using linear regression adjusting for batch and acquisition order.

848

### 849 **Targeted metabolomics analyses**

850 Circulating levels of PFAS (Per- and Polyfluorinated Substances) and cystatin C compounds  
851 were investigated using targeted mass spectrometry-based methods as described  
852 previously<sup>30,31</sup>.

853

854 Out of the 962 subjects from the main analysis, plasma samples from 909 subjects (from all  
855 countries except Japan) were randomized and sent frozen in dry ice to each respective  
856 laboratory for analyses. Measurement of cystatin C from 906 subjects included its native form  
857 and isoforms (3Pro-OH cystatin C, cystatin C-desS, 3Pro-OH cystatin C-desS and cystatin C-  
858 desSSP) that were modeled individually and for the total concentration of cystatin C isoforms.  
859 Measurements of PFAS compounds included PFOA (Perfluorooctanoic Acid; total, branch,  
860 linear), PFOS (Perfluorooctanoic Acid; total, branch, linear), PFHxS (Perfluorohexane  
861 sulfonate), PFNA (Perfluorononanoic acid), PFDA (Perfluorodecanoic acid), MePFOSAA (n-  
862 methylperfluoro-1 octanesulfonamido acetic acid), EtPFOSAA (2-(N-Ethyl-perfluorooctane.  
863 sulfonamido) acetic acid).

864

865 Multivariable quasi-Poisson (for the least sparse signatures SBS1, SBS40a and SBS40b) and  
866 logistic regression were used to estimate the association between plasma concentrations of  
867 the aforementioned substances and mutational signatures. All compounds were modeled  
868 continuously (log<sub>2</sub>-transformed) and categorically, with adjustments made by sex, age, date  
869 of recruitment, country, BMI, tobacco and alcohol status in the case of PFAS molecules and  
870 by sex, age and BMI, in the case of cystatin C.

871

872



## 873 **Geospatial analyses**

874 Geospatial analyses were performed to estimate the regional effect for signature attribution,  
875 particularly for signatures thought to be from exogenous exposure (SBS40b – unknown – and  
876 SBS22a/SB22b - Aristolochic acid). Residential history information was available for a large  
877 proportion of cases from the countries of interest: Czech Republic for SBS40b and  
878 Romania/Serbia for SBS22a/SBS22b. The 259 cases from Czech Republic within this study  
879 were recruited from 4 separate regions including Prague, České Budějovice (in Southern  
880 Bohemia), as well as Brno and Olomouc in the east of the country. Each individual residence  
881 was geocoded to its administrative region. All locations outside the country of recruitment were  
882 labeled as “Abroad”. A multi-membership mixed model was used to account for the full list of  
883 regions in which each subject resided, as well as the proportion of life spent in that region  
884 before diagnosis. As dependent variable, signatures were inverse-normal transformed. Models  
885 were adjusted for sex and age of diagnosis (fixed effects). The regional effect was treated as  
886 random effect.

887

## 888 **Data availability**

889 Whole genome sequencing data and patient metadata are deposited in the European  
890 Genome-phenome Archive (EGA) associated with study EGAS00001003542. Aligned BAM  
891 files for all ccRCC cases included in the final analysis were deposited in dataset  
892 EGAD00001012102, variant calling files in dataset EGAD00001012222 and patient metadata  
893 in dataset EGAD00001012223. The metabolomics data are available upon request. All other  
894 data are provided in the accompanying **Supplementary Tables**.

895

## 896 **Code availability**

897 All algorithms used for data analysis are publicly available with repositories noted within the  
898 respective method sections and in the accompanying reporting summary. Code used for  
899 regression analysis and figures is available at:

900 [https://gitlab.com/Mutographs/Mutographs\\_RCC](https://gitlab.com/Mutographs/Mutographs_RCC).

901

902

903 **Methods references**

- 904 1. Moody, S. *et al.* Mutational signatures in esophageal squamous cell carcinoma from  
905 eight countries with varying incidence. *Nat Genet* **53**, 1553–1563 (2021).
- 906 2. Scelo, G. *et al.* Variation in genomic landscape of clear cell renal cell carcinoma  
907 across Europe. *Nat Commun* **5**, 5135 (2014).
- 908 3. Campbell, P. J. *et al.* Pan-cancer analysis of whole genomes. *Nature* **578**, 82–93  
909 (2020).
- 910 4. Whalley, J. P. *et al.* Framework for quality assessment of whole genome cancer  
911 sequences. *Nat Commun* **11**, 5040 (2020).
- 912 5. Bergmann, E. A., Chen, B.-J., Arora, K., Vacic, V. & Zody, M. C. Conpair:  
913 concordance and contamination estimator for matched tumor–normal pairs.  
914 *Bioinformatics* **32**, 3196–3198 (2016).
- 915 6. Van Loo, P. *et al.* Allele-specific copy number analysis of tumors. *Proceedings of the*  
916 *National Academy of Sciences* **107**, 16910–16915 (2010).
- 917 7. Nik-Zainal, S. *et al.* The life history of 21 breast cancers. *Cell* **149**, 994–1007 (2012).
- 918 8. Jones, D. *et al.* cgpCaVEManWrapper: Simple Execution of CaVEMan in Order to  
919 Detect Somatic Single Nucleotide Variants in NGS Data. *Curr Protoc Bioinformatics*  
920 **56**, (2016).
- 921 9. Raine, K. M. *et al.* cgpPindel: Identifying Somatic Acquired Insertion and Deletion  
922 Events from Paired End Sequencing. *Curr Protoc Bioinformatics* **52**, (2015).
- 923 10. Kim, S. *et al.* Strelka2: fast and accurate calling of germline and somatic variants. *Nat*  
924 *Methods* **15**, 591–594 (2018).
- 925 11. Bergstrom, E. N. *et al.* SigProfilerMatrixGenerator: a tool for visualizing and exploring  
926 patterns of small mutational events. *BMC Genomics* **20**, 685 (2019).

- 927 12. Liu, M., Wu, Y., Jiang, N., Boot, A. & Rozen, S. G. mSigHdp: hierarchical Dirichlet  
928 process mixture modeling for mutational signature discovery. *bioRxiv*  
929 2022.01.31.478587 (2022) doi:10.1101/2022.01.31.478587.
- 930 13. Islam, S. M. A. *et al.* Uncovering novel mutational signatures by de novo extraction  
931 with SigProfilerExtractor. *Cell genomics* **2**, None (2022).
- 932 14. Alexandrov, L. B. *et al.* The repertoire of mutational signatures in human cancer.  
933 *Nature* **578**, 94–101 (2020).
- 934 15. Senkin, S. MSA: reproducible mutational signature attribution with confidence based  
935 on simulations. *BMC Bioinformatics* **22**, 540 (2021).
- 936 16. Martincorena, I. *et al.* Universal Patterns of Selection in Cancer and Somatic Tissues.  
937 *Cell* **171**, 1029-1041.e21 (2017).
- 938 17. Dentre, S. C., Wedge, D. C. & van Loo, P. Principles of Reconstructing the Subclonal  
939 Architecture of Cancers. *Cold Spring Harb Perspect Med* **7**, (2017).
- 940 18. Wilcoxon, F. Individual Comparisons by Ranking Methods. *Biometrics Bulletin* **1**, 80  
941 (1945).
- 942 19. Benjamini, Y. & Hochberg, Y. Controlling the False Discovery Rate: A Practical and  
943 Powerful Approach to Multiple Testing. *Journal of the Royal Statistical Society: Series*  
944 *B (Methodological)* **57**, 289–300 (1995).
- 945 20. Sung, H. *et al.* Global Cancer Statistics 2020: GLOBOCAN Estimates of Incidence  
946 and Mortality Worldwide for 36 Cancers in 185 Countries. *CA Cancer J Clin* **71**, 209–  
947 249 (2021).
- 948 21. Dušek, L. *et al.* Epidemiology of Malignant Tumours in the Czech Republic  
949 [online]. Masaryk University, Czech Republic, [2005]. <http://www.svod.cz/>. Version 7.0  
950 [2007], ISSN 1802 – 8861.
- 951 22. Liu, M. *et al.* Association studies of up to 1.2 million individuals yield new insights into  
952 the genetic etiology of tobacco and alcohol use. *Nat Genet* **51**, 237–244 (2019).

- 953 23. Yengo, L. *et al.* Meta-analysis of genome-wide association studies for height and body  
954 mass index in ~700000 individuals of European ancestry. *Hum Mol Genet* **27**, 3641–  
955 3649 (2018).
- 956 24. Lagou, V. *et al.* Sex-dimorphic genetic effects and novel loci for fasting glucose and  
957 insulin variability. *Nat Commun* **12**, 24 (2021).
- 958 25. Bycroft, C. *et al.* The UK Biobank resource with deep phenotyping and genomic data.  
959 *Nature* **562**, 203–209 (2018).
- 960 26. Alexander, D. H., Novembre, J. & Lange, K. Fast model-based estimation of ancestry  
961 in unrelated individuals. *Genome Res* **19**, 1655–1664 (2009).
- 962 27. Shim, H. *et al.* A Multivariate Genome-Wide Association Analysis of 10 LDL  
963 Subfractions, and Their Response to Statin Treatment, in 1868 Caucasians. *PLoS*  
964 *One* **10**, e0120758 (2015).
- 965 28. Choi, S. W. & O'Reilly, P. F. PRSice-2: Polygenic Risk Score software for biobank-  
966 scale data. *Gigascience* **8**, (2019).
- 967 29. Loffield, E. *et al.* Novel Biomarkers of Habitual Alcohol Intake and Associations With  
968 Risk of Pancreatic and Liver Cancers and Liver Disease Mortality. *JNCI: Journal of the*  
969 *National Cancer Institute* **113**, 1542–1550 (2021).
- 970 30. Shearer, J. J. *et al.* Serum Concentrations of Per- and Polyfluoroalkyl Substances and  
971 Risk of Renal Cell Carcinoma. *J Natl Cancer Inst* **113**, 580–587 (2021).
- 972 31. Gao, J., Meyer, K., Borucki, K. & Ueland, P. M. Multiplex Immuno-MALDI-TOF MS for  
973 Targeted Quantification of Protein Biomarkers and Their Proteoforms Related to  
974 Inflammation and Renal Dysfunction. *Anal Chem* **90**, 3366–3373 (2018).

975

## 976 **Acknowledgements**

977 The authors would like to thank Laura O'Neill, Kirsty Roberts, Katie Smith, Maisie Farenden,  
978 Siobhan Austin-Guest and the staff of DNA Pipelines at the Wellcome Sanger Institute for their  
979 contribution. We are grateful for the support provided by Maja Milojevic, Christophe Lallemand,  
980 Helene Renard, Aude Bardot, Andreea Spanu and Nivonirina Robinot as well as IARC General

981 Services, including the Laboratory Services and Biobank team led by Zisis Kozlakidis, the  
982 Section of Support to Research overseen by Tamas Landesz and the Evidence Synthesis and  
983 Classification Section led by Ian Cree, under IARC regular budget funding. The authors would  
984 like to thank Gislaine Bergo, Riley Cox and Juliana Oliveira for help with data/sample  
985 preparation and processing. The authors would also like to acknowledge the contributions of  
986 the Leeds Biobanking and Sample Processing Lab, the Leeds Multidisciplinary RTB and the  
987 Leeds NIHR BioRTB for provision of samples. The authors would like to thank Peter Campbell,  
988 Inigo Martincorena, Tim Butler, Daniela Mariosa, Laura Torrens Fontanals, Wellington Oliveira  
989 Dos Santos, Hana Zahed, Marc Gunter, Maggie Blanks and Mimi McCord for useful  
990 discussions. The authors would also like to thank all the patients and their families involved in  
991 this study.

992

### 993 **Funding**

994 This work was delivered as part of the Mutographs team supported by the Cancer Grand  
995 Challenges partnership funded by Cancer Research UK (C98/A24032). This work was  
996 supported by the Wellcome Trust grants 206194 and 220540/Z/20/A. The work was also partly  
997 funded by Barretos Cancer Hospital, the Public Ministry of Labor of Campinas (Research,  
998 Prevention, and Education of Occupational Cancer, 2015 to R.M.R.), and by Hospital de  
999 Clínicas de Porto Alegre (180330 to P.A.-P., M.B., B.S.N.). The work was also partly supported  
1000 by the Practical Research Project for Innovative Cancer Control from the Japan Agency for  
1001 Medical Research and Development (AMED) (JP20ck0106547h0001 to T.S.), and by the  
1002 National Cancer Center Japan Research and Development Fund (2020-A-7 to A.F.). The work  
1003 was also partly funded by the 1<sup>st</sup> and 2<sup>nd</sup> Faculties of Medicine, Charles University, Prague  
1004 (CAGEKID to I.H.; Occupation, Environment and Kidney Cancer in Central and Eastern  
1005 Europe to A.H.). The work was also partly supported by the Ministry of Health of the Czech  
1006 Republic (MH CZ – DRO (MMCI, 00209805) to L.F. and M.N.). Measurement of PFAS  
1007 compounds was funded by Division of Cancer Epidemiology and Genetics of the National

1008 Cancer Institute (USA). Measurement of cystatin C was funded by Cancer Research UK  
1009 (C18281/A29019).

1010

### 1011 **Contributions**

1012 The study was conceived, designed and supervised by M.R.S., P.B. and L.B.A. Analysis of  
1013 data was performed by S.Senkin, S.Moody, M.D.-G., T.C., A.F.-I., J.W., S.F., M.K., R.V.,  
1014 A.P.L., E.N.B., A.K., B.O., S.C., E.T., J.A., K.S.-B., R.C.C.P., V.G., D.J., J.W.T. and J.M.  
1015 Pathology review was carried out by B.A.-A., S.F. and M.A. Sample manipulation was carried  
1016 out by C.L., C.C. and P.C. Patient and sample recruitment was led or facilitated by  
1017 S.Sangkhathat, W.A., B.S., S.J., R.S., D.M., V.Jinga, S.R., S.Milosavljevic, M.M., S.Savic,  
1018 J.M.S.B, M.A., L.P., P.A.-P., M.B., B.S.N., S.M.B., M.P.C., S.C.Z., R.M.R., E.F., N.S.M.,  
1019 R.S.F., R.B., N.V., D.Z., A.M., O.S., V.M., L.F., M.N., I.H., A.H., V.Janout, S.C. and C.L., M.P.  
1020 P.K.-R., S.C., M.P., P.M.U. and M.J. contributed to data generation. Patient and sample  
1021 recruitment for Japanese cases was led by T.S. and A.F. Scientific project management was  
1022 carried out by L.H., E.C., G.S., A.C.D.C., A.F.-I. and S.P. S.Moody and S.Senkin jointly  
1023 contributed and were responsible for overall scientific coordination. The manuscript was  
1024 written by S.Senkin, S.Moody, M.R.S. and P.B. with contributions from all other authors.

1025

### 1026 **Competing interests**

1027 LBA is a compensated consultant and has equity interest in io9, LLC and Genome Insight. His  
1028 spouse is an employee of Biotheranostics, Inc. LBA is also an inventor of a US Patent  
1029 10,776,718 for source identification by non-negative matrix factorization. ENB and LBA declare  
1030 U.S. provisional applications with serial numbers: 63/289,601; 63/269,033; and 63/483,237.  
1031 LBA also declares U.S. provisional applications with serial numbers: 63/366,392; 63/367,846;  
1032 63/412,835; and 63/492,348. VM received honoraria from Ipsen, Bayer, AstraZeneca,  
1033 Janssen, Astellas Pharm and MSD, and provided expert testimony to BMS, Bayer, MSD and  
1034 Janssen. No other authors declare any competing interests.

1035

1036 **Disclaimer**

1037 Where authors are identified as personnel of the International Agency for Research on Cancer  
1038 / World Health Organization, the authors alone are responsible for the views expressed in this  
1039 article and they do not necessarily represent the decisions, policy or views of the International  
1040 Agency for Research on Cancer / World Health Organization.

1041

1042 **Corresponding author**

1043 Correspondence to Paul Brennan.

1044

1045 **EXTENDED DATA FIGURE AND TABLE LEGENDS**

1046 **Extended Data Fig. 1: Mutation burdens in clear cell renal cell carcinomas across**  
1047 **countries.**

1048 Mutation burdens for single base substitutions (SBS) **(a)**, doublet base substitutions (DBS)  
1049 **(b)** and small insertions and deletions (ID) **(c)** show significant differences between countries  
1050 using the Kruskal-Wallis (two-sided) test (n=961 biologically independent samples). Four  
1051 SBS hypermutators and four ID hypermutators above mutation burden of 30000 and 3000,  
1052 respectively, were removed for clarity. Box and whiskers plots are in the style of Tukey. The  
1053 line within the box is plotted at the median while the upper and lower ends are indicated 25th  
1054 and 75th percentiles. Whiskers show 1.5\*IQR (interquartile range) and values outside it are  
1055 shown as individual data points.

1056

1057 **Extended Data Fig. 2: Principal component analysis of relative mutation counts.**

1058 PCA performed on relative mutation counts of all ccRCC tumors incorporating the six  
1059 mutation classes (C>A, C>G, C>T, T>A, T>C, T>G). Principal component 1 (PC1) clearly  
1060 separates the cluster of mostly Romanian cases that are enriched with AA signatures, often  
1061 at high mutation burdens. Principal component 3 (PC3) identifies a cluster of mostly  
1062 Japanese cases, enriched with signature SBS12.

1063

1064 **Extended Data Fig 3: Attribution of signatures SBS40a, SBS40b, and SBS40c in a pan-**  
1065 **cancer cohort.**

1066 Attribution of signatures SBS40a, SBS40b, and SBS40c in a pan-cancer cohort, showing a  
1067 widespread distribution for SBS40a whilst SBS40b and SBS40c are only seen consistently in  
1068 clear cell renal cell carcinomas (ccRCC). The size of each dot represents the proportion of  
1069 samples of each tumor type where the signature is present. The color of each dot represents  
1070 the average mutation burden.

1071

1072 **Extended Data Fig. 4: Doublet-base substitution signatures operative in clear cell**  
1073 **renal cell carcinomas.**

1074 **(a)** Tumour mutation burden (TMB) plot showing the frequency and mutations per Mb for  
1075 each of the decomposed DBS signatures. **(b)** Average relative attribution for doublet-base  
1076 substitution (DBS) signatures across countries. Signatures contributing less than 5% on  
1077 average are grouped in the 'Other' category, apart from signature DBS\_D. Category named  
1078 '<95% confidence' accounts for the proportion of mutation burden which could not be  
1079 assigned to any signature with confidence level of at least 95%. **(c)** Decomposed DBS  
1080 signatures, including reference COSMIC signatures as well as *de novo* signatures not  
1081 decomposed into COSMIC reference signatures.

1082

1083 **Extended Data Fig. 5: Small insertions and deletion signatures operative in clear cell**  
1084 **renal cell carcinomas.**

1085 **(a)** Tumour mutation burden (TMB) plot showing the frequency and mutations per Mb for  
1086 each of the decomposed ID signatures. **(b)** Average relative attribution for small insertion and  
1087 deletion (ID) signatures across countries. Signatures contributing less than 5% on average  
1088 are grouped in the 'Others' category, apart from signature ID\_C. Category named '<95%  
1089 confidence' accounts for the proportion of mutation burden which could not be assigned to  
1090 any signature with confidence level of at least 95%. **(c)** Decomposed ID signatures, including



1091 reference COSMIC signatures as well as *de novo* signatures not decomposed into COSMIC  
1092 reference signatures.

1093

1094 **Extended Data Fig. 6: Correlation amongst signatures SBS22a, SBS22b, DBS\_D, ID\_C.**

1095

1096 **Extended Data Table 1: Presence of signatures SBS22a, SBS22b, DBS\_D, ID\_C across**  
1097 **countries.**

1098

1099 **Extended Data Fig. 7: Single base substitution signatures showing significant**  
1100 **differences in attributed mutation burden between countries.**

1101 Signatures SBS40a (a) and SBS40b (b) were more prevalent in high-incidence regions of  
1102 Czech Republic and Lithuania. Signatures SBS22a (c) and SBS22b (d) were enriched in  
1103 Romania and Serbia. SBS1 (e), SBS5 (f) and SBS4 (g) showed moderate differences across  
1104 countries. Signature SBS12 (h) is highly prevalent in Japan. Five SBS1 hypermutators above  
1105 mutation burden of 1000 were removed for clarity. Box and whiskers plots are in the style of  
1106 Tukey. The line within the box is plotted at the median while the upper and lower ends are  
1107 indicated 25th and 75th percentiles. Whiskers show 1.5\*IQR (interquartile range) and values  
1108 outside it are shown as individual data points.

1109

1110 **Extended Data Fig. 8: Association of mutational signatures with incidence of renal**  
1111 **cancer.**

1112 Number of mutations attributed to signatures (a) SBS40a, (b) ID5 and (c) ID8 against age-  
1113 standardized incidence rate (ASR) of kidney cancer in each of the eleven countries  
1114 represented in the cohort. Error bars represent standard errors of the mean. The p-values  
1115 shown are for the ASR variable in linear regressions across all cases, adjusted for sex and  
1116 age of diagnosis.

1117

1118

1119 **Extended Data Fig. 9: Association of mutation burden with incidence of renal cancer.**  
1120 Association of age-standardized rates (ASR) of kidney cancer incidence with SBS **(a)**, DBS  
1121 **(b)** and ID **(c)** mutation burdens across countries. Error bars represent standard errors of the  
1122 mean. The p-values shown are for the ASR variable in linear regressions across all cases,  
1123 adjusted for sex and age of diagnosis.

1124

1125 **Extended Data Fig. 10: Evolutionary analysis of mutational signatures in ccRCC.**  
1126 Comparison of mutational signatures between clonal and subclonal mutations. Lines show  
1127 the change in relative activity between the clonal mutations (main) and subclonal mutations  
1128 (sub) within a sample. Blue and red lines represent an activity change of more than 6% (blue  
1129 indicates higher in the clonal mutations; red indicates higher in the subclonal mutations). Bar  
1130 plots show the distribution of activities in samples where the signature was present in the  
1131 clonal and/or subclonal mutations; this number is represented in the title of each plot as  
1132  $X/223$  for each signature. Black bars indicate one standard deviation away from the mean.  
1133 Significance was assessed using a two-sided Wilcoxon signed-rank test, and q-values were  
1134 generated using the Benjamini-Hochberg Procedure.

**Fig.1**

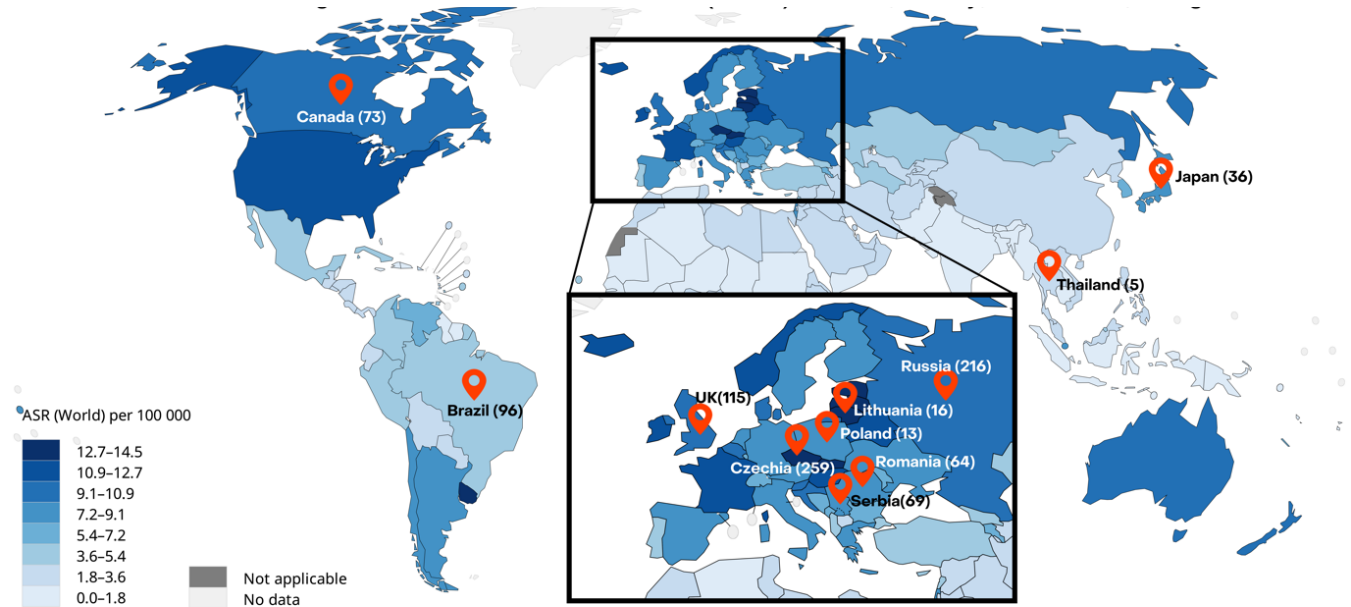

All rights reserved. The designations employed and the presentation of the material in this publication do not imply the expression of any opinion whatsoever on the part of the World Health Organization / International Agency for Research on Cancer concerning the legal status of any country, territory, city or area or of its authorities, or concerning the delimitation of its frontiers or boundaries. Dotted and dashed lines on maps represent approximate borderlines for which there may not yet be full agreement.

Data source: GLOBOCAN 2020  
Map production: IARC  
(<http://gco.iarc.fr/today>)  
World Health Organization

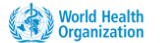

© International Agency for Research on Cancer 2020  
All rights reserved

**Table 1**

| Country (ASR/100,000)    | Brazil (4.5)    | Canada (10.4) | Czechia (14.4) | Japan (7.6) | Lithuania (14.5) | Poland (8.1) | Romania (7.7) | Russia (10.3) | Serbia (7.4) | Thailand (1.8) | UK (10.3) | Total (4.6) |           |
|--------------------------|-----------------|---------------|----------------|-------------|------------------|--------------|---------------|---------------|--------------|----------------|-----------|-------------|-----------|
| Number of cases          | 96              | 73            | 259            | 36          | 16               | 13           | 64            | 216           | 69           | 5              | 115       | 962         |           |
| Sex                      | Female          | 44            | 22             | 93          | 8                | 9            | 5             | 25            | 98           | 30             | 4         | 42          | 380       |
|                          | Male            | 52            | 51             | 166         | 28               | 7            | 8             | 39            | 118          | 39             | 1         | 73          | 582       |
| Age at diagnosis (years) | 0-45            | 15            | 6              | 27          | 3                | 1            | 2             | 6             | 43           | 16             | 0         | 6           | 125       |
|                          | 45-55           | 20            | 17             | 51          | 5                | 0            | 6             | 10            | 44           | 11             | 0         | 22          | 186       |
|                          | 55-65           | 30            | 17             | 77          | 8                | 9            | 1             | 20            | 91           | 27             | 2         | 41          | 323       |
|                          | 65-75           | 24            | 27             | 72          | 13               | 4            | 4             | 20            | 32           | 9              | 2         | 31          | 238       |
|                          | 75+             | 7             | 6              | 32          | 7                | 2            | 0             | 8             | 6            | 6              | 1         | 15          | 90        |
| Year of recruitment      | 1999-2005       |               |                | 93          |                  |              | 13            | 14            | 18           |                |           | 138         |           |
|                          | 2005-2010       |               |                | 111         |                  |              |               | 19            | 70           | 1              |           | 232         |           |
|                          | 2010-2015       |               | 9              | 55          | 28               |              |               | 31            | 116          | 68             |           | 348         |           |
|                          | 2015-2020       | 96            | 64             |             | 8                | 16           |               |               | 12           |                | 5         | 244         |           |
| Stage                    | I               | 28            | 3              | 123         | 24               | 6            | 0             | 33            | 94           | 32             |           | 53          | 396       |
|                          | II              | 2             | 0              | 42          | 1                | 0            | 6             | 12            | 24           | 4              |           | 8           | 99        |
|                          | III             | 16            | 23             | 46          | 6                | 5            | 5             | 18            | 65           | 26             |           | 38          | 248       |
|                          | IV              | 7             | 10             | 38          | 5                | 2            | 2             | 1             | 33           | 7              |           | 16          | 121       |
|                          | Missing         | 43            | 37             | 10          |                  | 3            |               |               |              |                | 5         |             | 98        |
| Body mass index          | <20             | 3             | 2              | 5           | 2                | 0            | 2             | 2             | 9            | 8              | 0         | 6           | 39        |
|                          | 20-25           | 21            | 10             | 100         | 25               | 2            | 3             | 17            | 84           | 28             | 3         | 23          | 316       |
|                          | 25-30           | 35            | 24             | 85          | 7                | 6            | 6             | 30            | 40           | 20             | 1         | 45          | 299       |
|                          | >30             | 37            | 37             | 69          | 2                | 8            | 2             | 14            | 83           | 13             | 1         | 41          | 307       |
|                          | Missing         |               |                |             |                  |              |               | 1             |              |                |           |             | 1         |
| Hypertension             | No              | 45            | 28             | 129         | 16               | 5            | 9             | 39            | 125          | 28             | 2         | 58          | 484       |
|                          | Yes             | 51            | 44             | 130         | 20               | 10           | 4             | 24            | 91           | 41             | 3         | 56          | 474       |
|                          | Missing         |               | 1              |             |                  | 1            |               | 1             |              |                |           | 1           | 4         |
| Diabetes                 | No              | 76            | 55             | 130         | 29               | 9            |               | 45            | 186          | 61             | 3         | 95          | 689       |
|                          | Yes             | 20            | 16             | 36          | 7                | 7            |               | 4             | 12           | 8              | 2         | 20          | 132       |
|                          | Missing         |               | 2              | 93          |                  |              | 13            | 15            | 18           |                |           |             | 141       |
| Family history of ccRCC  | No              | 90            | 42             | 165         | 35               | 16           |               | 54            | 192          | 67             | 5         | 102         | 726       |
|                          | Yes             | 5             | 4              | 22          | 1                | 0            |               | 1             | 6            | 2              | 0         | 3           | 43        |
|                          | Missing         | 1             | 27             | 72          |                  |              | 13            | 9             | 18           |                |           | 10          | 193       |
| Tobacco status           | Current smoker  | 23            | 21             | 66          | 9                | 4            | 6             | 11            | 52           | 18             | 1         | 28          | 239       |
|                          | Ex-smoker       | 21            | 30             | 62          | 15               | 3            | 3             | 15            | 27           | 15             | 0         | 44          | 235       |
|                          | Never           | 52            | 22             | 131         | 11               | 9            | 4             | 37            | 137          | 36             | 4         | 43          | 486       |
|                          | Missing         |               |                |             | 1                |              |               | 1             |              |                |           |             | 2         |
| PFOA (ng/mL)             | Mean (st. dev.) | 0.7 (0.5)     | 1.6 (1.1)      | 3.4 (2.1)   |                  | 1.3 (0.6)    | 5.4 (4.1)     | 1.3 (0.9)     | 1.5 (1.4)    | 1.3 (0.6)      | 2.2 (2.2) | 3.3 (1.7)   | 2.2 (1.9) |

**a Fig. 2**

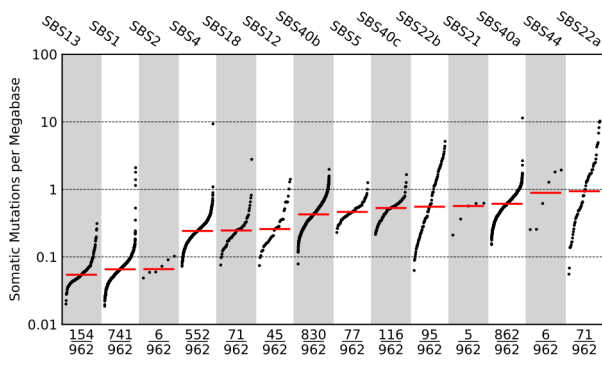

\*Showing samples with counts more than 0

**b**

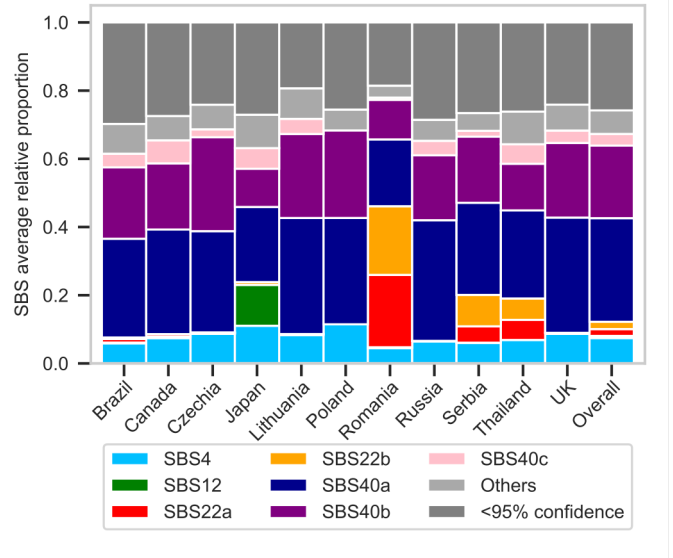

**c**

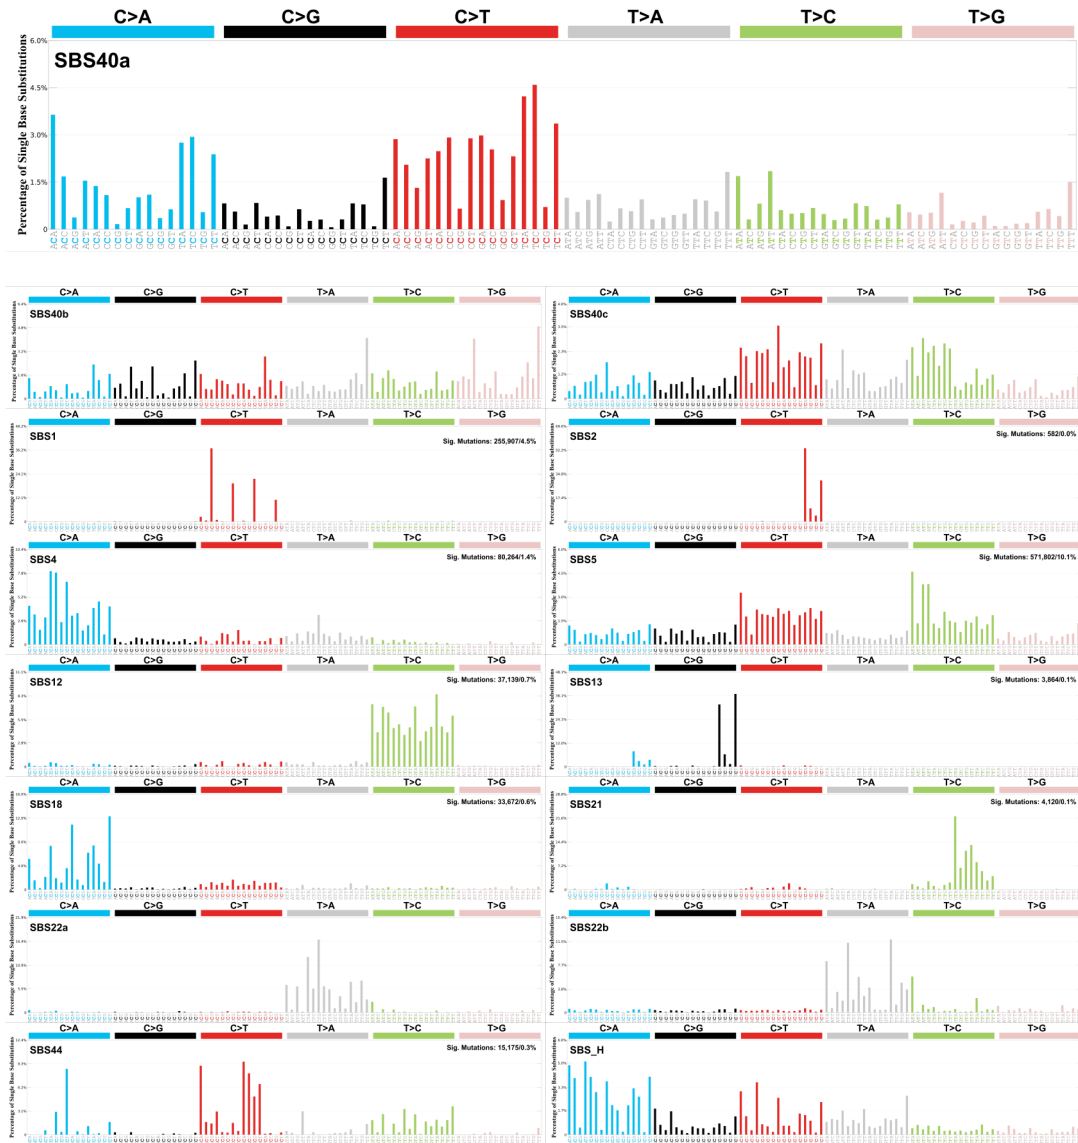

Fig. 3

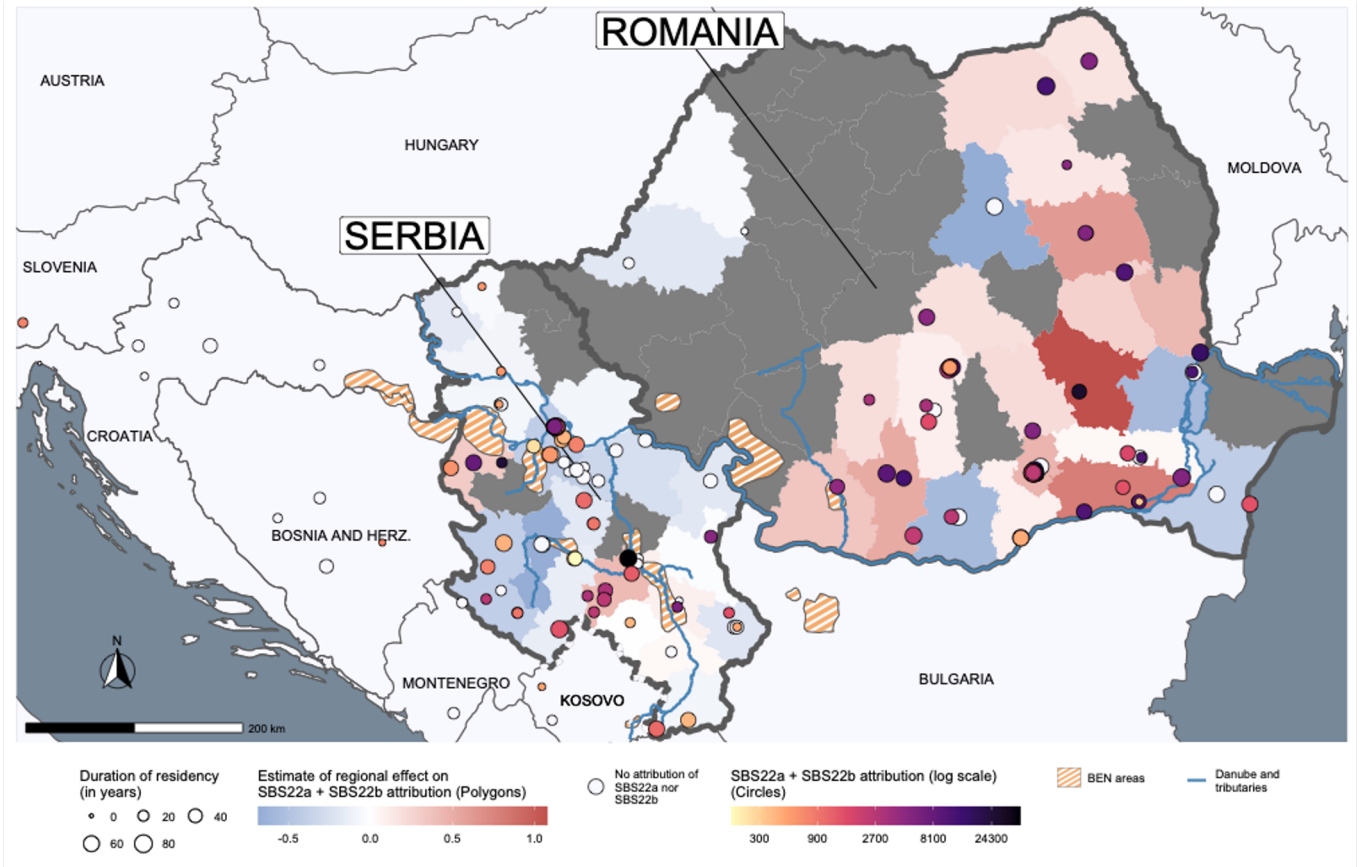

**Fig. 4**

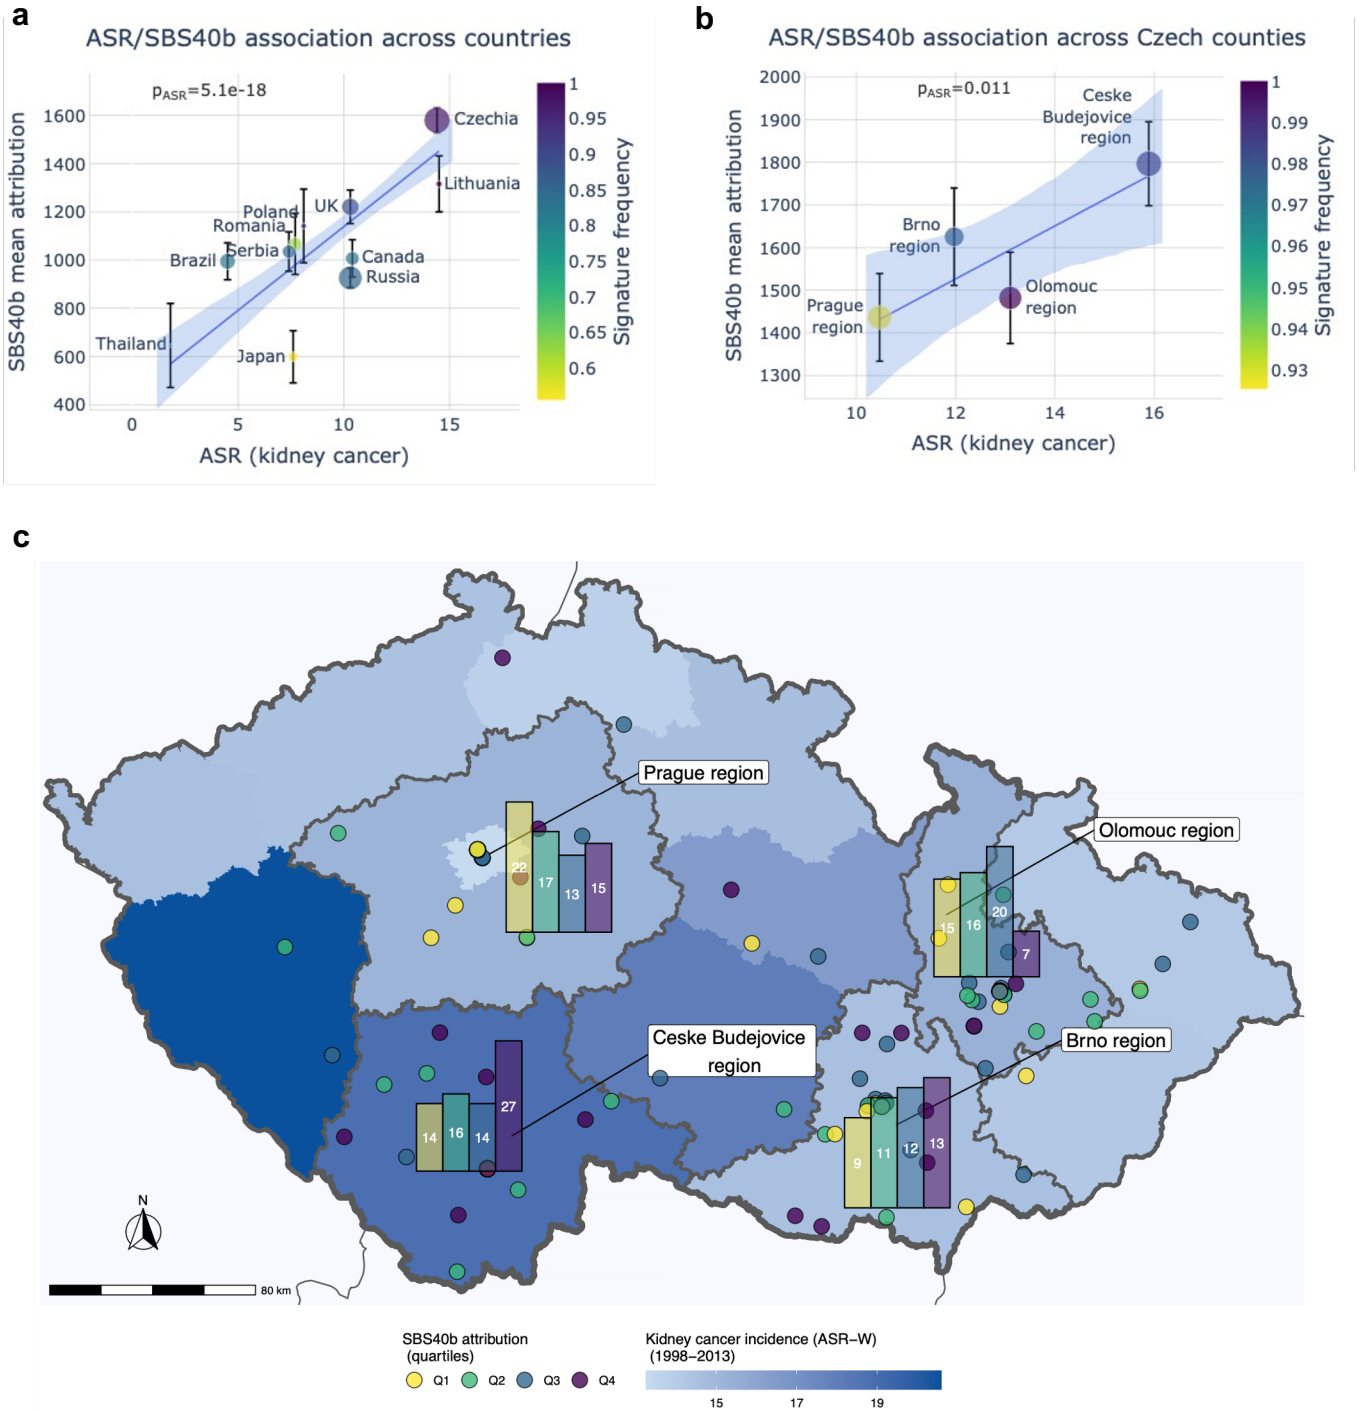

**Fig. 5**

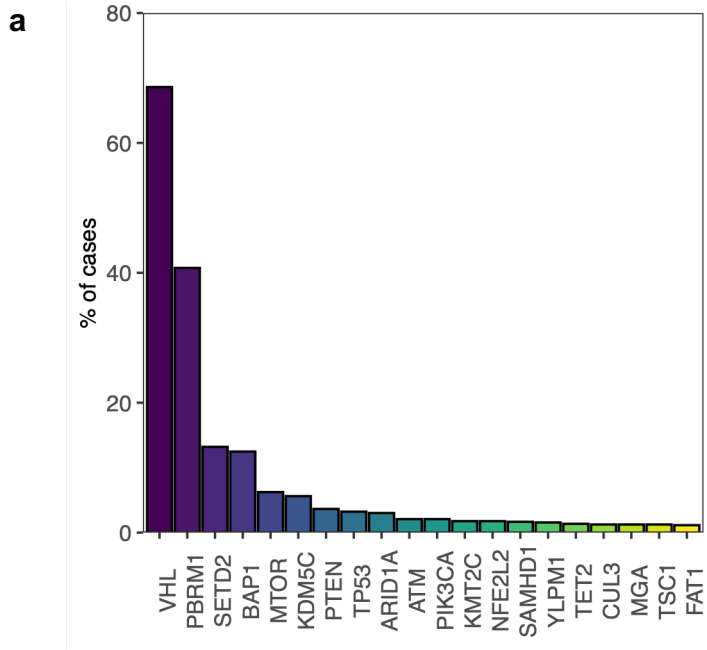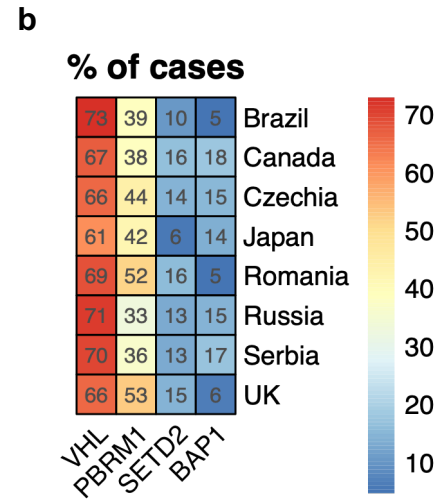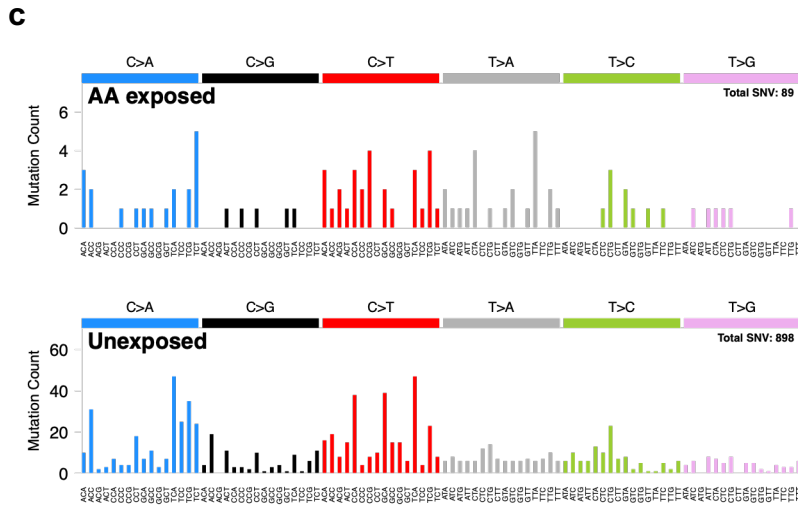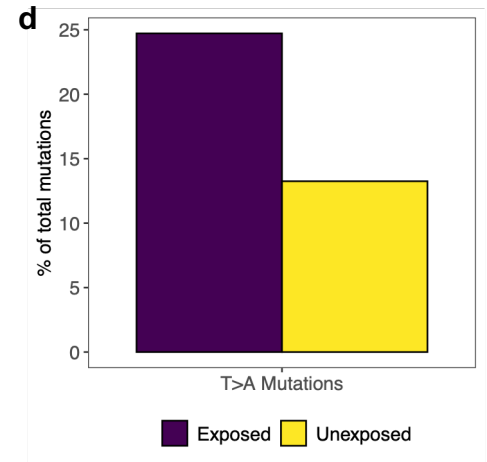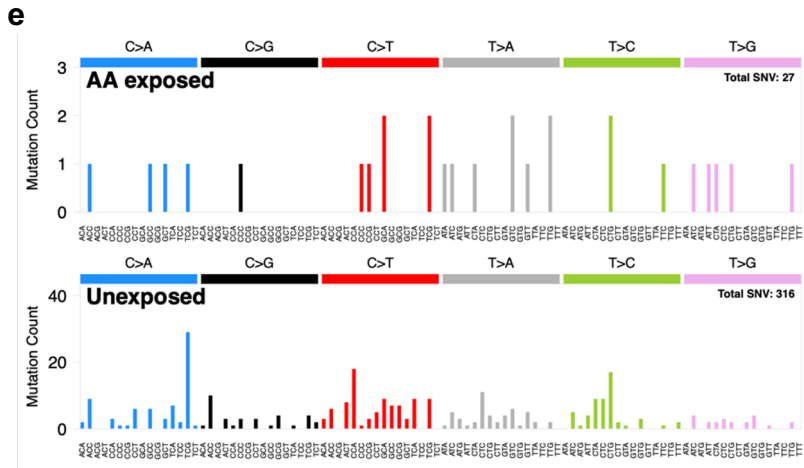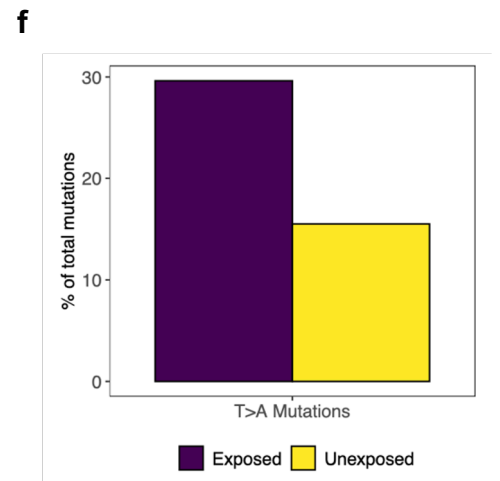



**Extended Data Fig. 1.**

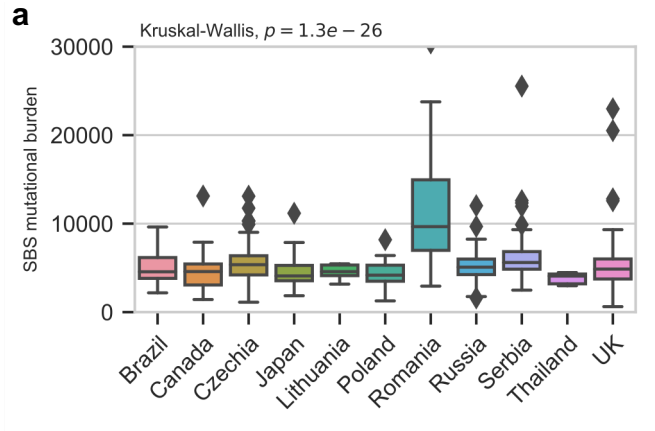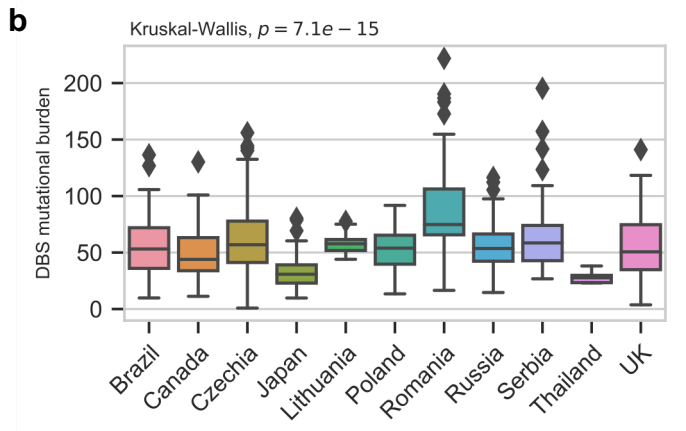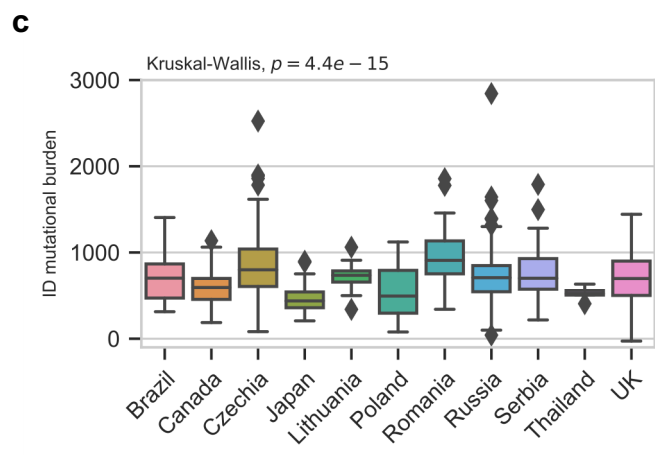

Extended Data Fig. 2.

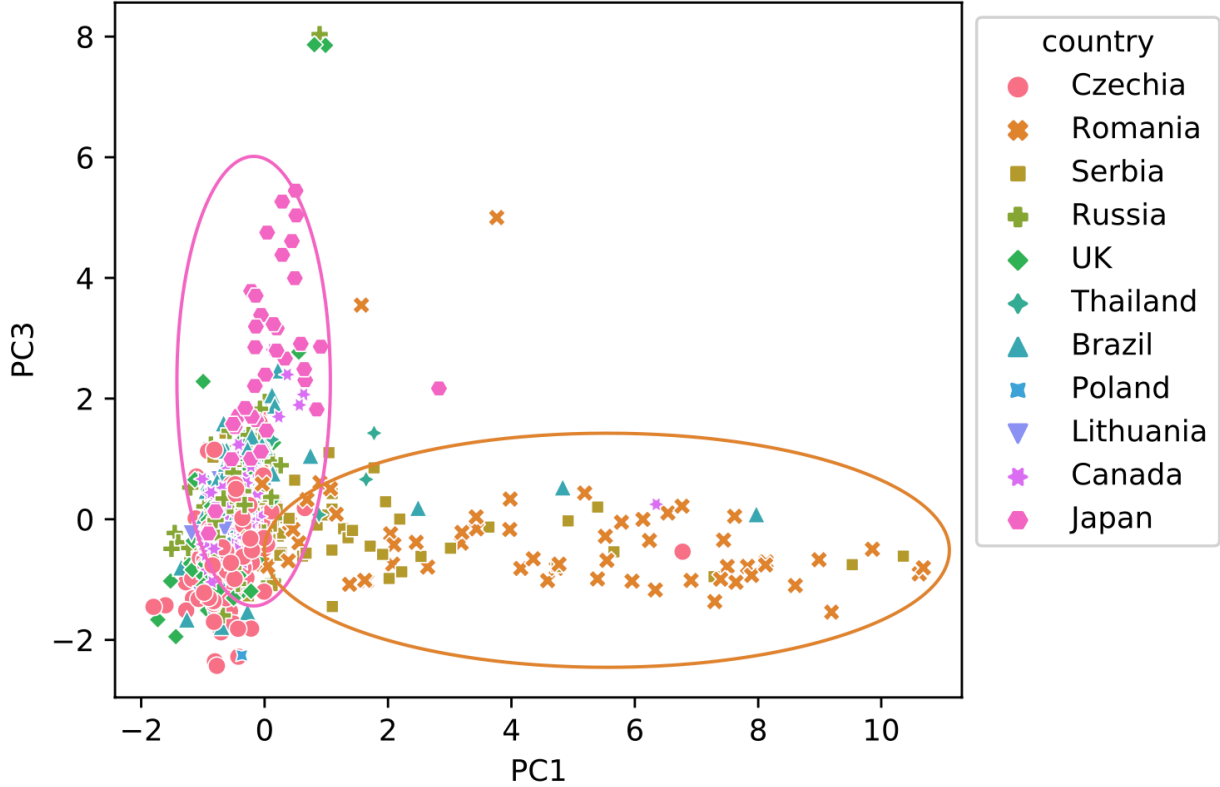

Extended Data Fig. 3.

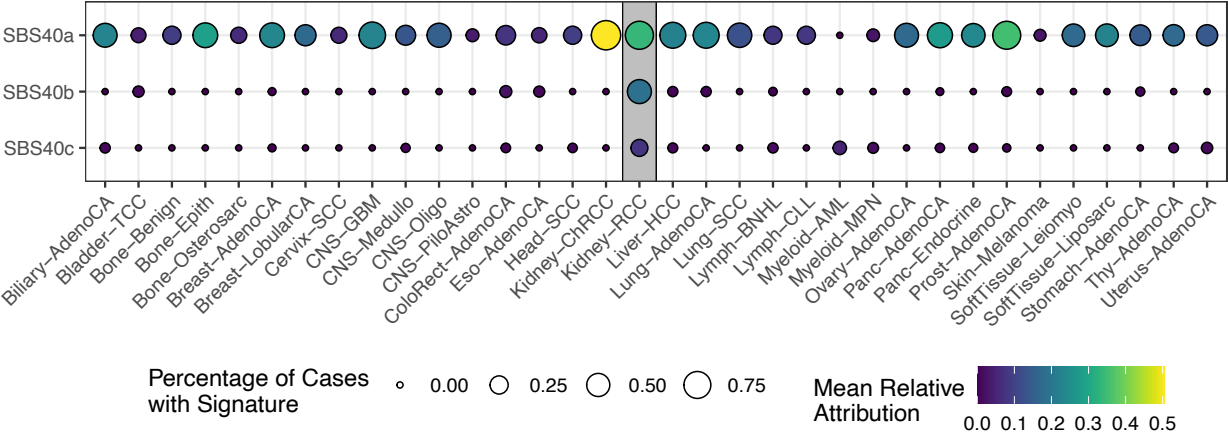

Extended Data Fig. 4.

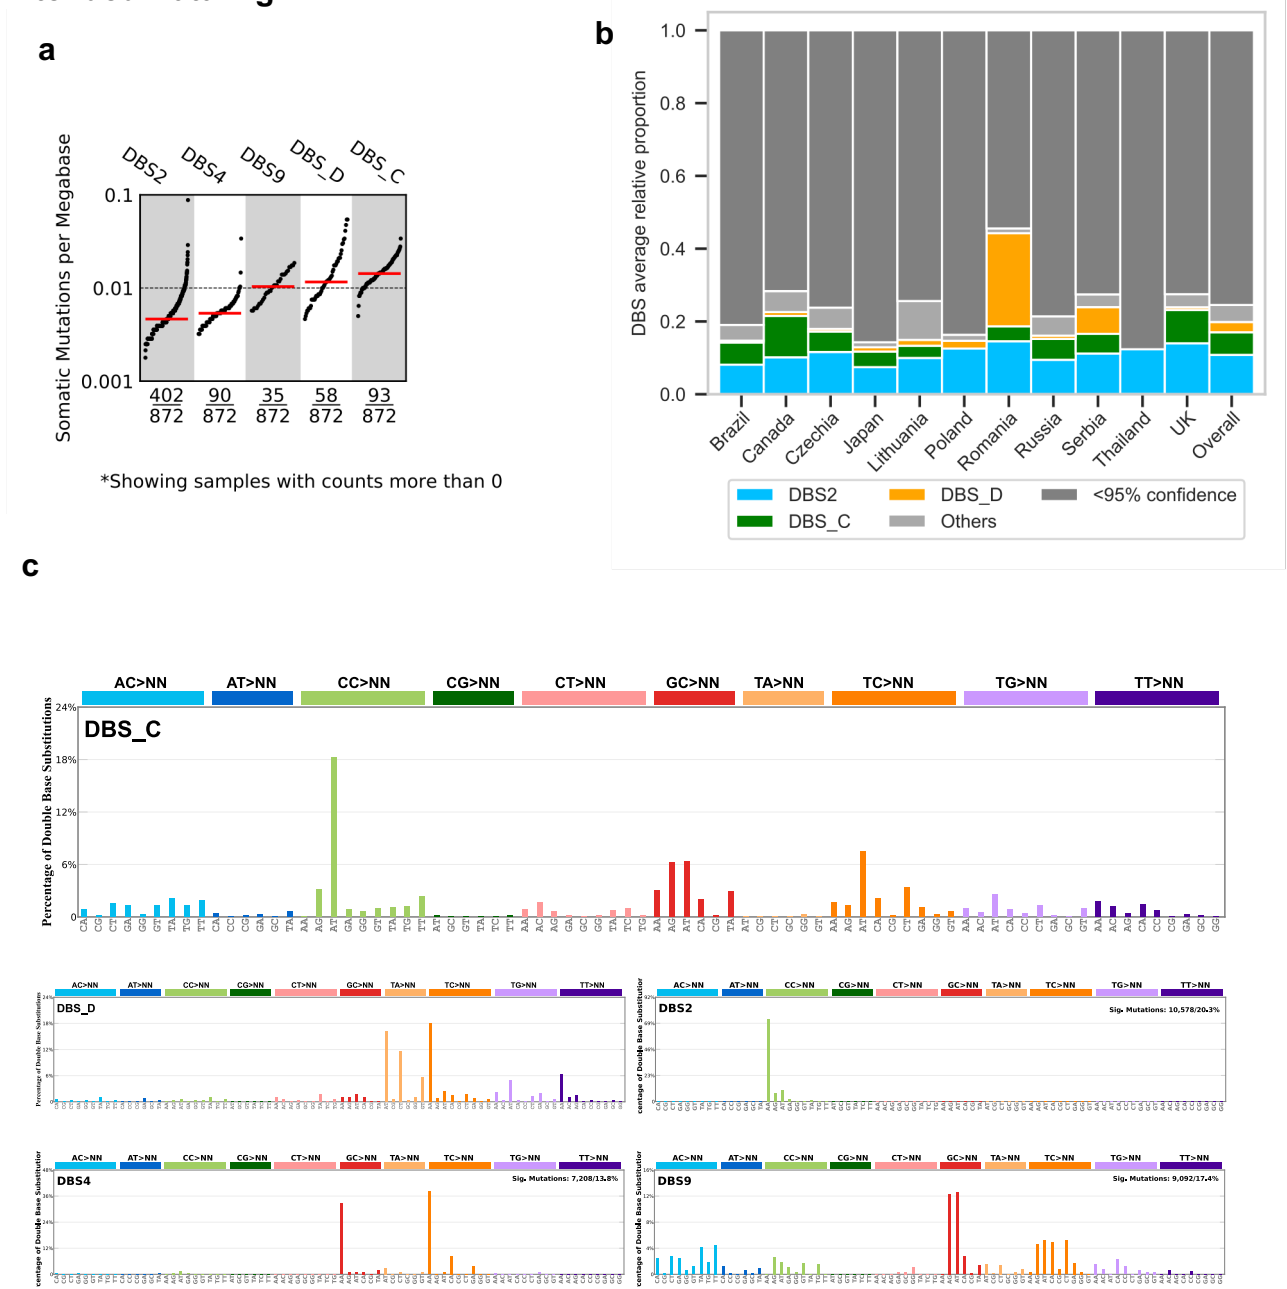

Extended Data Fig. 5.

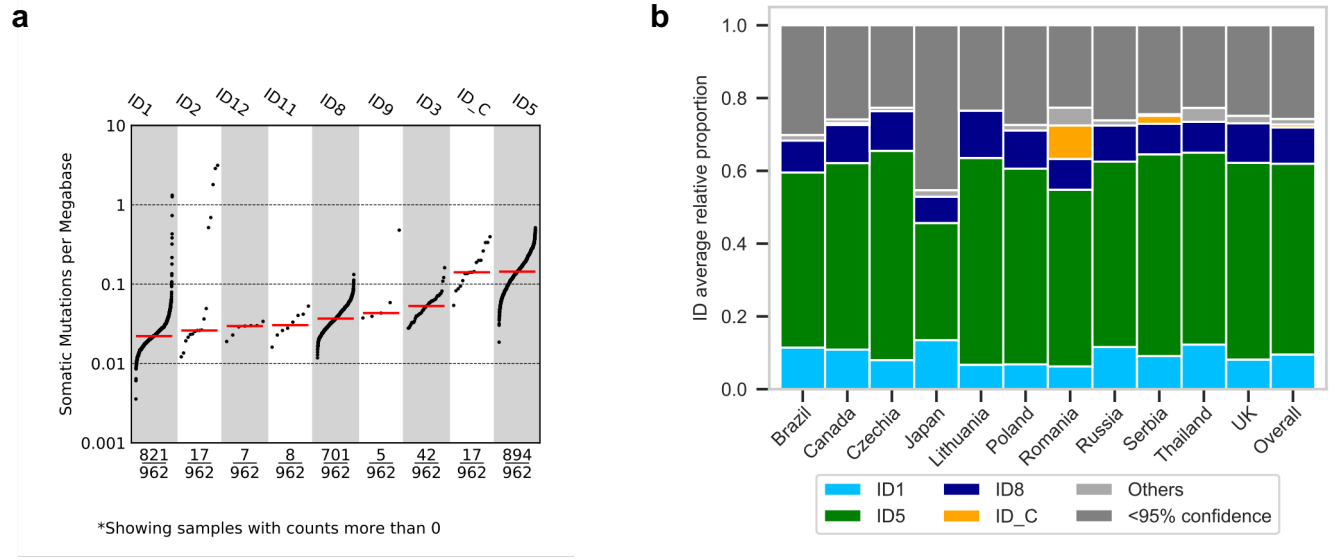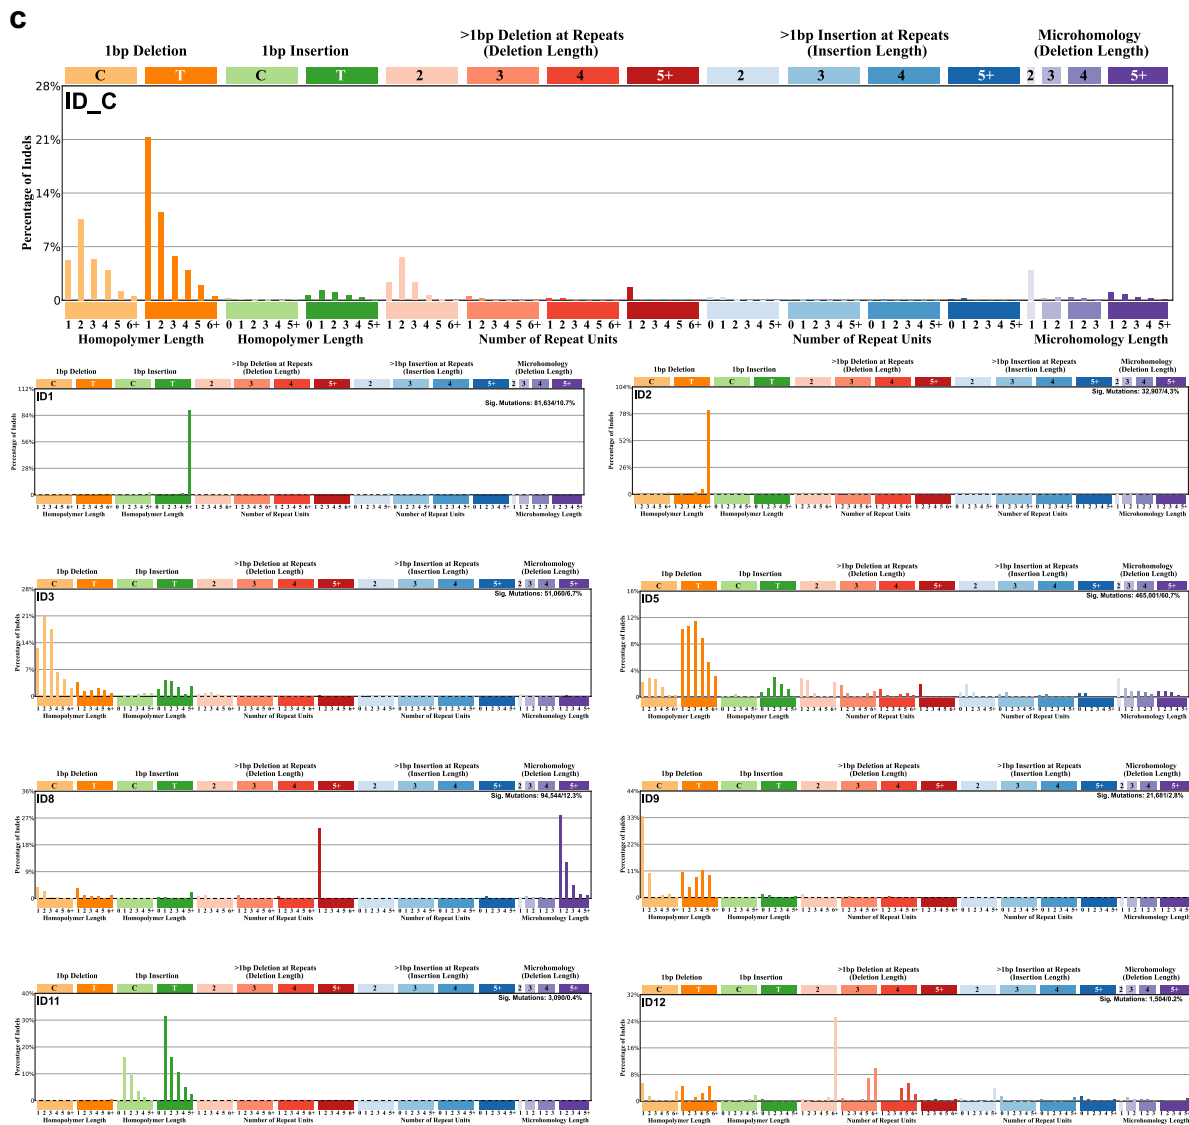

**Extended Data Fig. 6.**

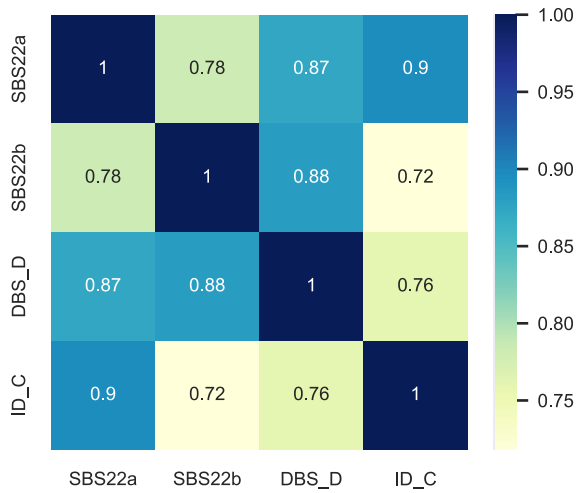

**Extended Data Table 1.**

| Country          | N cases | SBS22a (%) | SBS22b (%) | DBS_D (%) | ID_C (%)  | SBS22a or SBS22b (%) | Any (%)   |
|------------------|---------|------------|------------|-----------|-----------|----------------------|-----------|
| <b>Romania</b>   | 64      | 45 (70.3)  | 48 (75.0)  | 42 (65.6) | 13 (20.3) | 53 (82.8)            | 54 (84.4) |
| <b>Serbia</b>    | 69      | 16 (23.2)  | 33 (47.8)  | 11 (15.9) | 3 (4.3)   | 35 (50.7)            | 36 (52.2) |
| <b>Thailand</b>  | 5       | 3 (60.0)   | 3 (60.0)   | 0 (0.0)   | 0 (0.0)   | 4 (80.0)             | 4 (80.0)  |
| <b>Brazil</b>    | 96      | 3 (3.1)    | 3 (3.1)    | 1 (1.0)   | 0 (0.0)   | 3 (3.1)              | 3 (3.1)   |
| <b>Canada</b>    | 73      | 2 (2.7)    | 0 (0.0)    | 2 (2.7)   | 1 (1.4)   | 2 (2.7)              | 3 (4.1)   |
| <b>Czechia</b>   | 259     | 1 (0.4)    | 5 (1.9)    | 32 (12.4) | 0 (0.0)   | 6 (2.3)              | 37 (14.3) |
| <b>UK</b>        | 115     | 1 (0.9)    | 0 (0.0)    | 31 (27.0) | 0 (0.0)   | 1 (0.9)              | 31 (27.0) |
| <b>Russia</b>    | 216     | 0 (0.0)    | 1 (0.5)    | 26 (12.0) | 0 (0.0)   | 1 (0.5)              | 27 (12.5) |
| <b>Poland</b>    | 13      | 0 (0.0)    | 0 (0.0)    | 1 (7.7)   | 0 (0.0)   | 0 (0.0)              | 1 (7.7)   |
| <b>Lithuania</b> | 16      | 0 (0.0)    | 1 (6.2)    | 1 (6.2)   | 0 (0.0)   | 1 (6.2)              | 2 (12.5)  |
| <b>Japan</b>     | 36      | 0 (0.0)    | 1 (2.8)    | 1 (2.8)   | 0 (0.0)   | 1 (2.8)              | 1 (2.8)   |

**Extended Data Fig. 7.**

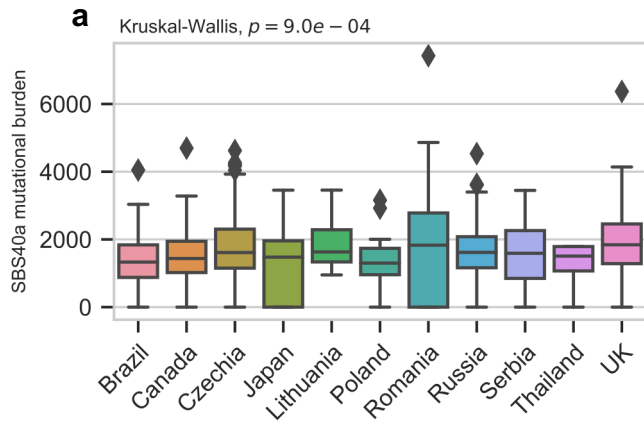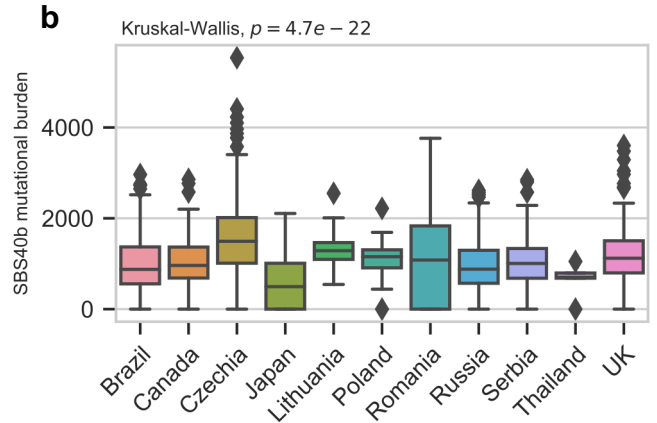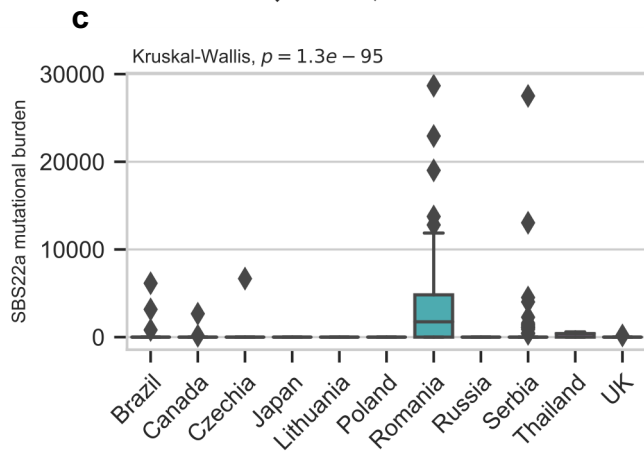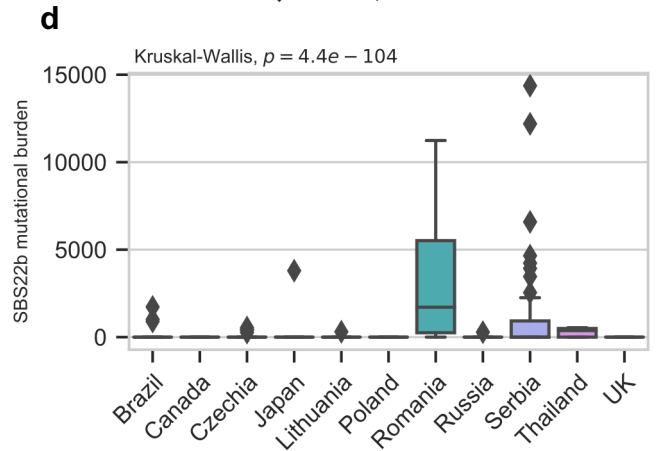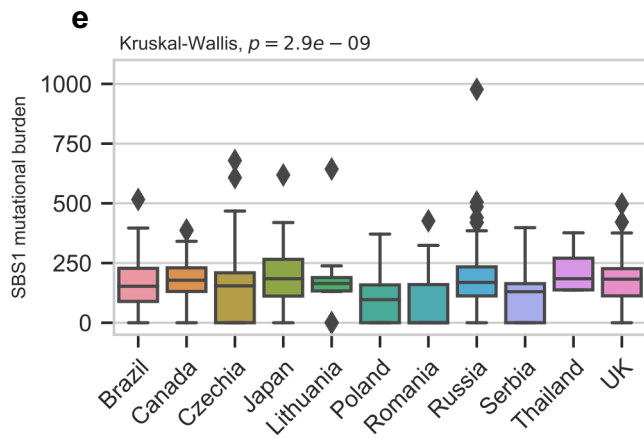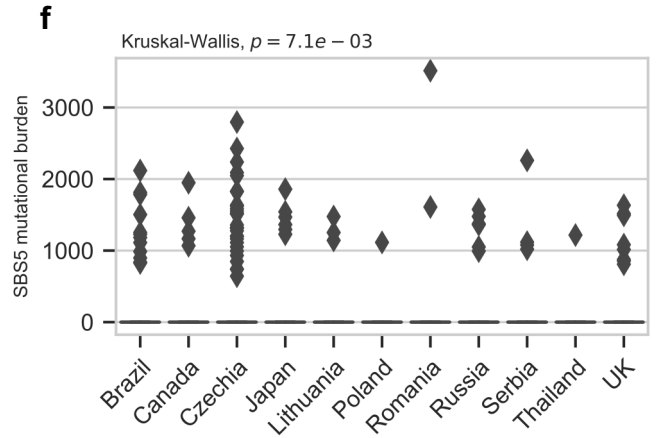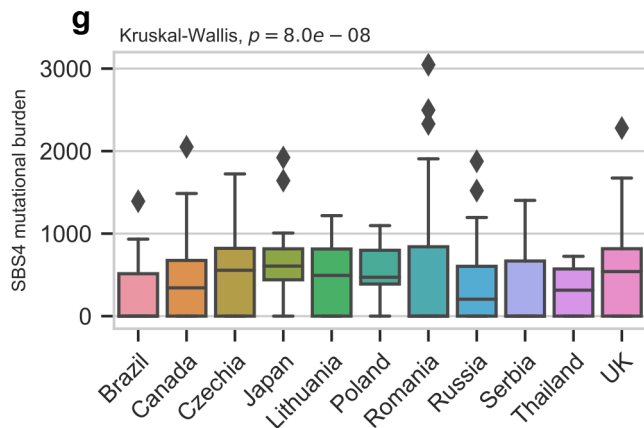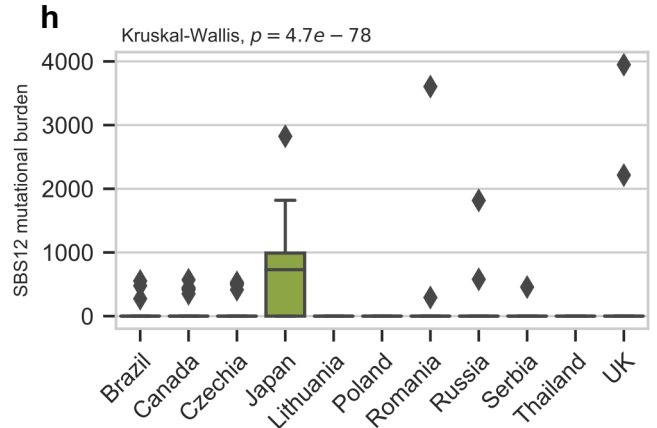

**Extended Data Fig. 8.**

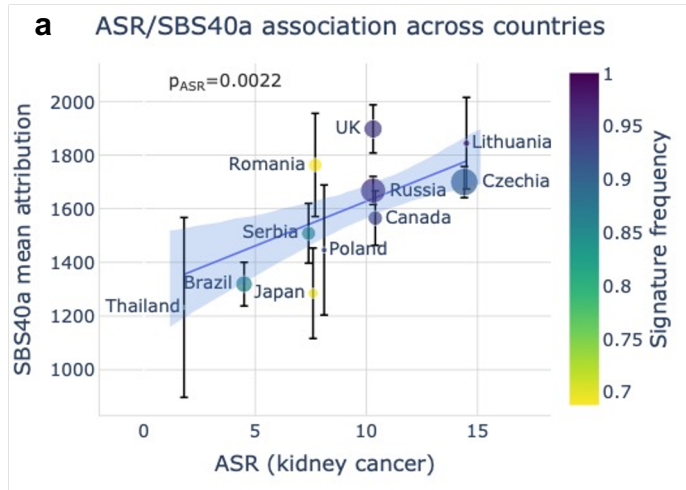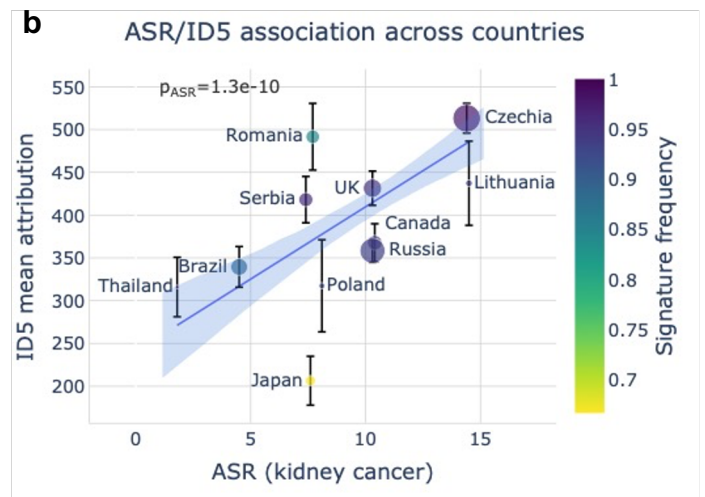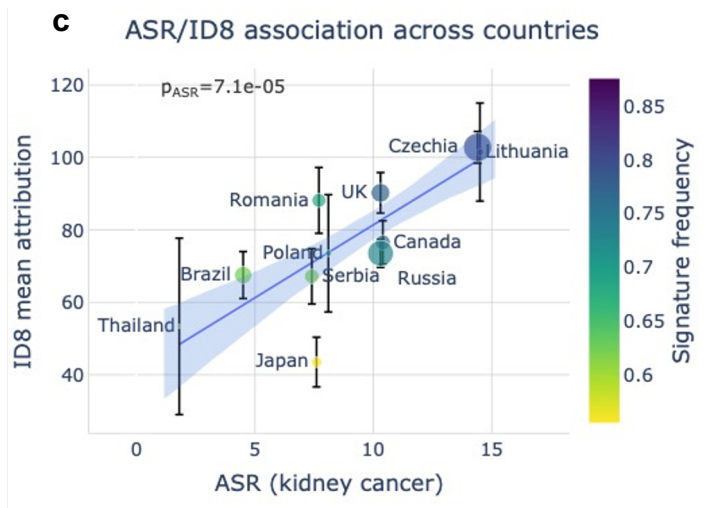



**Extended Data Fig. 9.**

**a** ASR/SBS burden association across countries

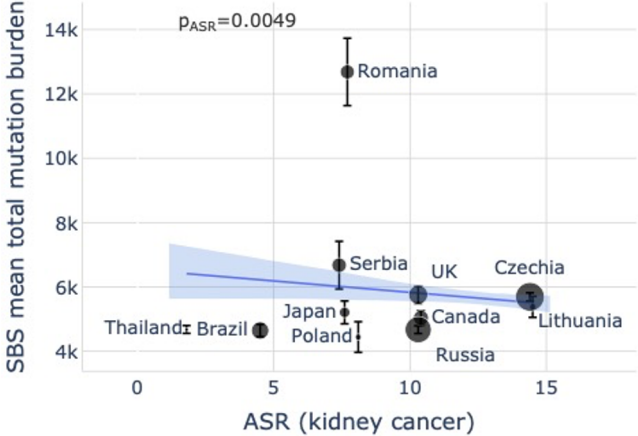

**b** ASR/DBS burden association across countries

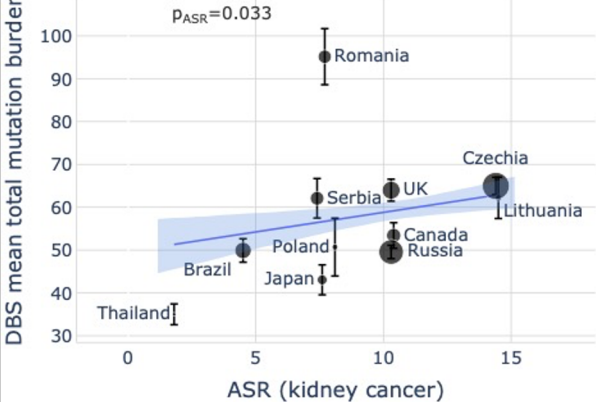

**c** ASR/ID burden association across countries

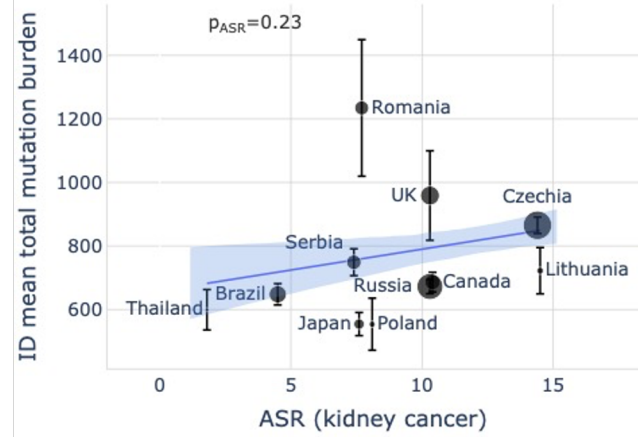

### Extended Data Fig. 10.

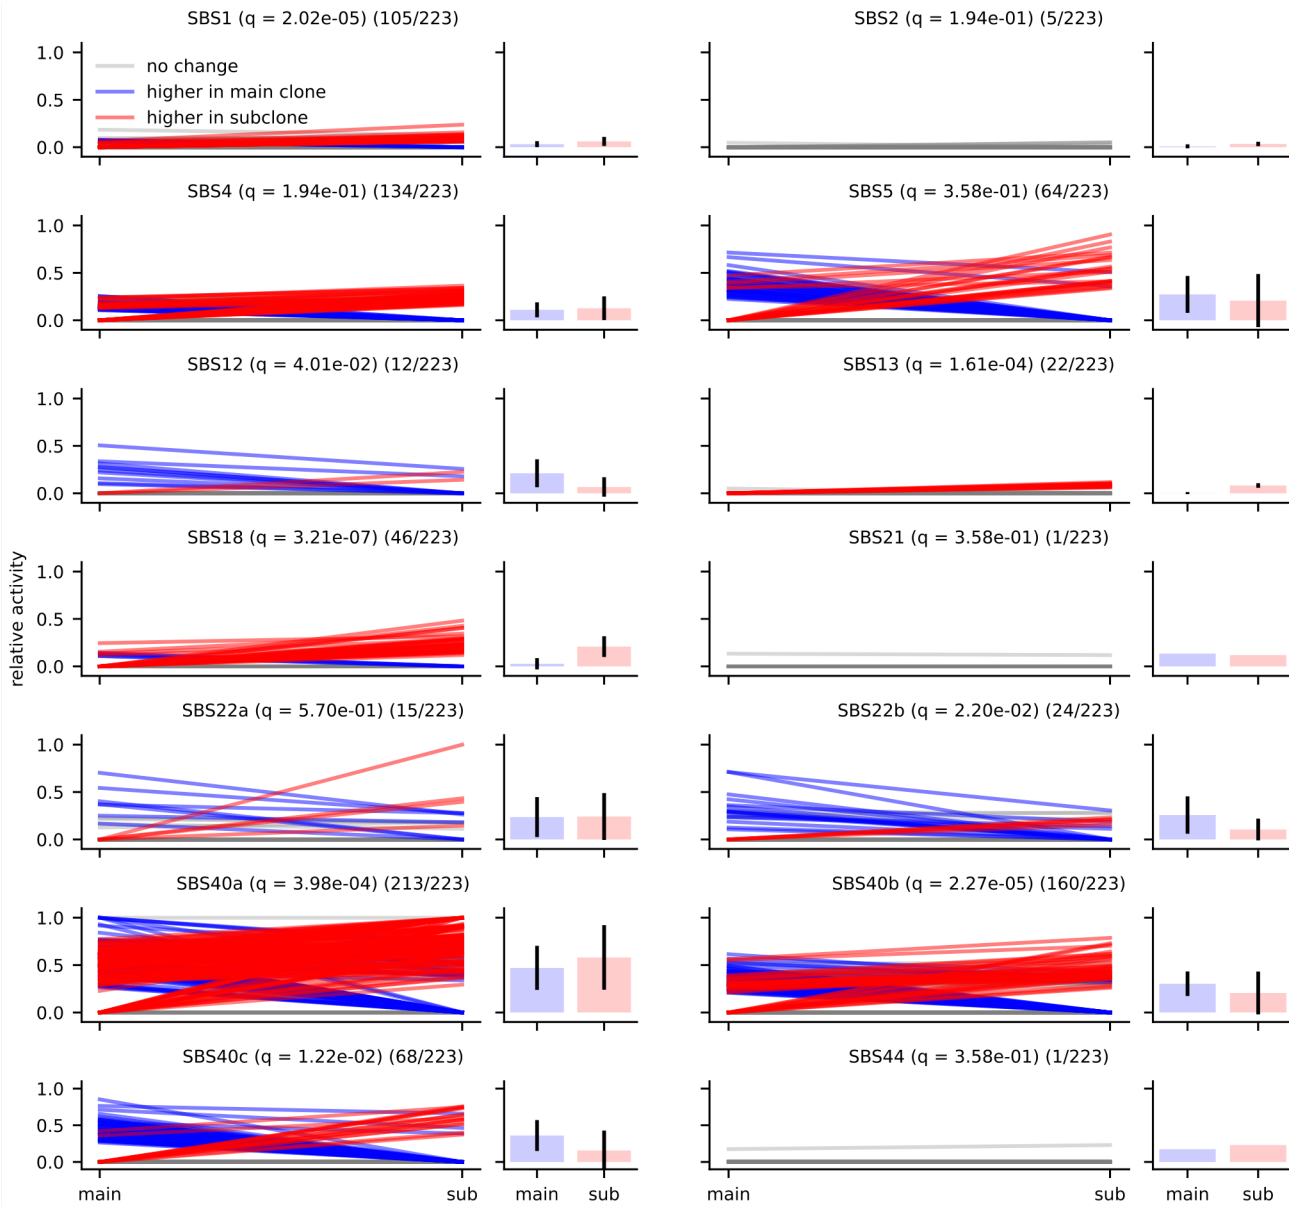

Source: https://medrxiv.org/content/10.1101/2023.06.20.23291538v2.full.pdf
